# Supplementary material for: Polygenic regression uncovers trait-relevant cellular contexts through pathway activation transformation of single-cell RNA sequencing data
Source: bioRxiv or medRxiv preprint supplement (doi:10.1101/2023.03.04.23286805), 2023-03-06
Supplement: Supplementary file [file media-2.pdf]

1  
2  
3  
4  
5  
6  
7  
8  
9  
10  
11  
12  
13  
14  
15  
16  
17  
18  
19  
20  
21  
22  
23  
24  
25  
26  
27  
28  
29  
30  
31  
32  
33  
34  
35  
36  
37  
38  
39  
40

***Supplementary Tables***

41  
42

**Supplementary Table S1. Summary of GWAS summary statistics on 13 complex diseases and traits used in the current study**

| Phenotypes                                       | Year | Data ID              | Population      | Sample size | Number of SNPs | Resources                                                                                                                   |
|--------------------------------------------------|------|----------------------|-----------------|-------------|----------------|-----------------------------------------------------------------------------------------------------------------------------|
| Monocyte count                                   | 2020 | ieu-b-31             | European        | 563,946     | 26,946,895     | <a href="https://gwas.mrcieu.ac.uk/datasets/ieu-b-31/">https://gwas.mrcieu.ac.uk/datasets/ieu-b-31/</a>                     |
| Lymphocyte count                                 | 2016 | ebi-a-GCST004627     | European        | 171,643     | 29,167,587     | <a href="https://gwas.mrcieu.ac.uk/datasets/ebi-a-GCST004627/">https://gwas.mrcieu.ac.uk/datasets/ebi-a-GCST004627/</a>     |
| Lymphocyte percent of white cells                | 2016 | ebi-a-GCST004632     | European        | 171,748     | 29,167,359     | <a href="https://gwas.mrcieu.ac.uk/datasets/ebi-a-GCST004632/">https://gwas.mrcieu.ac.uk/datasets/ebi-a-GCST004632/</a>     |
| Mean corpus volume                               | 2020 | ebi-a-GCST90002335   | European        | 121,047     | 14,991,118     | <a href="https://gwas.mrcieu.ac.uk/datasets/ebi-a-GCST90002335/">https://gwas.mrcieu.ac.uk/datasets/ebi-a-GCST90002335/</a> |
| Neutrophil count                                 | 2020 | ieu-b-34             | European        | 563,946     | 26,935,743     | <a href="https://gwas.mrcieu.ac.uk/datasets/ieu-b-34/">https://gwas.mrcieu.ac.uk/datasets/ieu-b-34/</a>                     |
| White blood cell count                           | 2020 | ieu-b-30             | European        | 563,946     | 27,090,906     | <a href="https://gwas.mrcieu.ac.uk/datasets/ieu-b-30/">https://gwas.mrcieu.ac.uk/datasets/ieu-b-30/</a>                     |
| Eosinophil count                                 | 2020 | ieu-b-33             | European        | 563,946     | 26,776,110     | <a href="https://gwas.mrcieu.ac.uk/datasets/ieu-b-33/">https://gwas.mrcieu.ac.uk/datasets/ieu-b-33/</a>                     |
| Basophil count                                   | 2020 | ieu-b-29             | European        | 563,946     | 26,797,882     | <a href="https://gwas.mrcieu.ac.uk/datasets/ieu-b-29/">https://gwas.mrcieu.ac.uk/datasets/ieu-b-29/</a>                     |
| Mean corpuscular hemoglobin concentration (MCHC) | 2020 | ebi-a-GCST90002329   | East Asian      | 126,151     | 14,939,486     | <a href="https://gwas.mrcieu.ac.uk/datasets/ebi-a-GCST90002329/">https://gwas.mrcieu.ac.uk/datasets/ebi-a-GCST90002329/</a> |
| Hemoglobin concentration                         | 2020 | ebi-a-GCST90002311   | East Asian      | 149,861     | 15,410,015     | <a href="https://gwas.mrcieu.ac.uk/datasets/ebi-a-GCST90002311/">https://gwas.mrcieu.ac.uk/datasets/ebi-a-GCST90002311/</a> |
| Hospitalized COVID-19                            | 2021 | B2_ALL_leave_23andme | European        | 969,689     | 9,368,170      | <a href="https://www.covid19hg.org/">https://www.covid19hg.org/</a>                                                         |
| Alzheimer's disease                              | 2019 | ieu-b-2              | European        | 63,926      | 10,528,610     | <a href="https://gwas.mrcieu.ac.uk/datasets/ieu-b-2/">https://gwas.mrcieu.ac.uk/datasets/ieu-b-2/</a>                       |
| Schizophrenia                                    | 2022 | PGC3_SCZ_wave3       | European (~80%) | 161,405     | 7,585,078      | <a href="https://figshare.com/articles/dataset/scz2022/19426775">https://figshare.com/articles/dataset/scz2022/19426775</a> |

43  
44  
45

**Supplementary Table S2. Summary of eight single-cell sequencing datasets spanning 1,404,556 cells from human and mouse used in the current study**

| Data set      | Species | Number of cells | Number of cell types | Tissues /Organ | Description                                                                         | Resources                                                                                                                                           |
|---------------|---------|-----------------|----------------------|----------------|-------------------------------------------------------------------------------------|-----------------------------------------------------------------------------------------------------------------------------------------------------|
| Granja et al. | Human   | 35,582          | 24                   | BMMC           | This dataset contains the full spectrum of human hematopoietic differentiation from | <a href="https://jeffgranja.s3.amazonaws.com/MPAL-10x/Supplementary_Data/He">https://jeffgranja.s3.amazonaws.com/MPAL-10x/Supplementary_Data/He</a> |

|                   |       |         |    |                  |                                                                                                                                                                                  |                                                                                                                                             |
|-------------------|-------|---------|----|------------------|----------------------------------------------------------------------------------------------------------------------------------------------------------------------------------|---------------------------------------------------------------------------------------------------------------------------------------------|
|                   |       |         |    |                  | stem cells to their corresponding progenies                                                                                                                                      | <a href="https://www.ncbi.nlm.nih.gov/geo/query/acc.cgi?acc=GSE134355">althy-Data/scRNA-Healthy-Hematopoiesis-191120.rds</a>                |
| Stephenson et al. | Human | 97,039  | 17 | PBMC             | 24 healthy individuals with PBMC samples, using the 10X Genomics scRNA-seq platform                                                                                              | <a href="https://www.ebi.ac.uk/arrayexpress/experiments/E-MTAB-10026/">https://www.ebi.ac.uk/arrayexpress/experiments/E-MTAB-10026/</a>     |
| Han et al.        | Human | 513,707 | 60 | 35 adult tissues | Using microwell-seq platform to perform scRNA-seq for determining the cell type composition of all major human organs                                                            | <a href="https://www.ncbi.nlm.nih.gov/geo/query/acc.cgi?acc=GSE134355">https://www.ncbi.nlm.nih.gov/geo/query/acc.cgi?acc=GSE134355</a>     |
| Bryois et al.     | Mouse | 160,796 | 39 | Brain            | Single cell suspensions of all brain regions, the majority of sampling was sequenced by using the 10X Genomics scRNA-seq platform                                                | <a href="https://storage.googleapis.com/linnarsson-lab-loom/15_all.loom">https://storage.googleapis.com/linnarsson-lab-loom/15_all.loom</a> |
| Grubman et al.    | Human | 11,786  | 5  | Brain            | One region of entorhinal cortex from control and AD brains of 12 individuals, the Illumina HiSeq 500 according to the 10X Genomics protocol for snRNA-seq                        | <a href="https://www.ncbi.nlm.nih.gov/geo/query/acc.cgi?acc=GSE138852">https://www.ncbi.nlm.nih.gov/geo/query/acc.cgi?acc=GSE138852</a>     |
| Smith et al.      | Human | 101,906 | 9  | Brain            | Two brain regions of entorhinal and somatosensory cortex from 6 non-disease control and 6 AD cases, the Illumina HiSeq 4000 according to the 10X Genomics protocol for snRNA-seq | <a href="https://www.ncbi.nlm.nih.gov/geo/query/acc.cgi?acc=GSE160936">https://www.ncbi.nlm.nih.gov/geo/query/acc.cgi?acc=GSE160936</a>     |
| Agarwal et al.    | Human | 14,287  | 8  | Brain            | The first human single-nuclei RNA-seq for substantia nigra and matched cortical brain regions from 12 samples The 10X chromium system (V2) was used for single-cell sequencing   | <a href="https://www.ncbi.nlm.nih.gov/geo/query/acc.cgi?acc=GSE140231">https://www.ncbi.nlm.nih.gov/geo/query/acc.cgi?acc=GSE140231</a>     |

|           |       |         |    |      |                                                                                                |                                                                                                                                     |
|-----------|-------|---------|----|------|------------------------------------------------------------------------------------------------|-------------------------------------------------------------------------------------------------------------------------------------|
| Su et al. | Human | 469,453 | 13 | PBMC | Containing the major immune cell classes in COVID-19 patients, 10X Genomics scRNA-seq platform | <a href="https://www.ebi.ac.uk/arrayexpress/experiments/E-MTAB-9357">https://www.ebi.ac.uk/arrayexpress/experiments/E-MTAB-9357</a> |
|-----------|-------|---------|----|------|------------------------------------------------------------------------------------------------|-------------------------------------------------------------------------------------------------------------------------------------|

46  
47  
48

**Supplementary Table S3. GO-term (biological process) enrichment analysis of top-ranked 1,000 genes from scPagwas and MAGMA (FDR < 0.01) for 10 blood cell traits**

| Blood cell trait | GO-terms enriched by scPagwas top 1,000 genes (FDR < 0.01)                                                                                                                                                                                                                                                                                                                                                                                                                                                                                                                                                                                                                                                                                                                                                                                                                                                                                                                                                                                                                                                                                                                                                                                      | GO-terms enriched by MAGMA top 1,000 genes (FDR < 0.01)                                                                                                                                                                                                                                        | GO-terms enriched by TWAS top 1,000 genes (FDR < 0.01) | GO-terms enriched by S-PrediXcan top 1,000 genes (FDR < 0.01) | GO-terms enriched by S-MultiXcan top 1,000 genes (FDR < 0.01)                                                                                              |
|------------------|-------------------------------------------------------------------------------------------------------------------------------------------------------------------------------------------------------------------------------------------------------------------------------------------------------------------------------------------------------------------------------------------------------------------------------------------------------------------------------------------------------------------------------------------------------------------------------------------------------------------------------------------------------------------------------------------------------------------------------------------------------------------------------------------------------------------------------------------------------------------------------------------------------------------------------------------------------------------------------------------------------------------------------------------------------------------------------------------------------------------------------------------------------------------------------------------------------------------------------------------------|------------------------------------------------------------------------------------------------------------------------------------------------------------------------------------------------------------------------------------------------------------------------------------------------|--------------------------------------------------------|---------------------------------------------------------------|------------------------------------------------------------------------------------------------------------------------------------------------------------|
| Monocyte count   | GO:0036230, GO:0002446, GO:0002521, GO:0002764, GO:0002694, GO:0042110, GO:0030099, GO:0050867, GO:0006909, GO:0034341, GO:0019882, GO:0071706, GO:0007159, GO:0001819, GO:0007015, GO:0031349, GO:0045088, GO:0002250, GO:1903706, GO:0042113, GO:0045785, GO:0070661, GO:0051051, GO:0022407, GO:0060627, GO:0032970, GO:1901652, GO:0002237, GO:0050727, GO:1902903, GO:0071216, GO:0051258, GO:0051493, GO:0007249, GO:0072593, GO:0002449, GO:0002697, GO:0051090, GO:0052547, GO:0022604, GO:0043254, GO:0002576, GO:0001818, GO:0045576, GO:0032635, GO:2001233, GO:0002532, GO:0071887, GO:0032637, GO:0032612, GO:0032103, GO:0050817, GO:0032418, GO:0006898, GO:0050900, GO:0002448, GO:0072524, GO:0002285, GO:0061919, GO:0098542, GO:0050663, GO:0071900, GO:0090066, GO:0007229, GO:0016052, GO:0031589, GO:0007162, GO:0051098, GO:0042116, GO:0032606, GO:0002683, GO:0042107, GO:0072512, GO:2000147, GO:0042326, GO:1902532, GO:0090662, GO:0009141, GO:0035690, GO:0032633, GO:0034109, GO:0002440, GO:0071496, GO:0032602, GO:0050878, GO:1904951, GO:0033002, GO:0070671, GO:0032609, GO:2001057, GO:0060326, GO:0042092, GO:0010959, GO:0000041, GO:0097193, GO:0050866, GO:0010324, GO:0032615, GO:0048872, GO:0006979, | GO:0006909, GO:0050900, GO:0002521, GO:0030099, GO:0007159, GO:0042110, GO:1903706, GO:0045785, GO:0042113, GO:0060326, GO:0060249, GO:0002683, GO:0060627, GO:0046777, GO:0070741, GO:1990868, GO:0006968, GO:0002694, GO:0048872, GO:0071900, GO:0050867, GO:0036230, GO:0043254, GO:0048017 | Null                                                   | GO:0006968                                                    | GO:0034341, GO:0019882, GO:0060326, GO:0007159, GO:0050900, GO:1990868, GO:0006968, GO:0002764, GO:0006909, GO:0032103, GO:0042110, GO:0050920, GO:0030099 |

|                                   |                                                                                                                                                                                                                                                                                                                                                                                                                                                                                                                                                                                                                                                                                                                                                                                                                                                                                                                                                                                                                                                                                                                                                                                                                                                                                                                                                                        |      |                           |      |      |
|-----------------------------------|------------------------------------------------------------------------------------------------------------------------------------------------------------------------------------------------------------------------------------------------------------------------------------------------------------------------------------------------------------------------------------------------------------------------------------------------------------------------------------------------------------------------------------------------------------------------------------------------------------------------------------------------------------------------------------------------------------------------------------------------------------------------------------------------------------------------------------------------------------------------------------------------------------------------------------------------------------------------------------------------------------------------------------------------------------------------------------------------------------------------------------------------------------------------------------------------------------------------------------------------------------------------------------------------------------------------------------------------------------------------|------|---------------------------|------|------|
|                                   | GO:0051346, GO:0031529,<br>GO:0007568, GO:0048013,<br>GO:0032613, GO:0150076,<br>GO:0045862, GO:0007033,<br>GO:0070997, GO:0038061,<br>GO:0070371, GO:0050690,<br>GO:0140029, GO:0031098,<br>GO:0099132, GO:0043112,<br>GO:0007265, GO:0060759,<br>GO:0061351, GO:0045730,<br>GO:0048010, GO:0051047,<br>GO:0031348, GO:0002269,<br>GO:0032386, GO:0009636,<br>GO:0032623, GO:1902600,<br>GO:0002791, GO:0043900,<br>GO:0104004, GO:0071800,<br>GO:0051235, GO:0009123,<br>GO:1901136, GO:0097305,<br>GO:1990778, GO:0097191,<br>GO:0003012, GO:0051348,<br>GO:0022406, GO:0006090,<br>GO:0046677, GO:0001906,<br>GO:0046939, GO:0016197,<br>GO:0009595, GO:0001667,<br>GO:0045861, GO:0031099,<br>GO:0034404, GO:0070482,<br>GO:0051701, GO:0016050,<br>GO:0018212, GO:0097581,<br>GO:0006968, GO:0051156,<br>GO:0006091, GO:0009615,<br>GO:0090130, GO:0009620,<br>GO:0009743, GO:0016049,<br>GO:0019058, GO:0034330,<br>GO:0097006, GO:0031532,<br>GO:0016051, GO:0046434,<br>GO:0009132, GO:0051271,<br>GO:0010573, GO:0006732,<br>GO:0038127, GO:0034340,<br>GO:0006907, GO:0031579,<br>GO:0097242, GO:0048771,<br>GO:1904950, GO:0055076,<br>GO:1901342, GO:0042063,<br>GO:0001773, GO:0006959,<br>GO:0031647, GO:0005996,<br>GO:0050769, GO:0001525,<br>GO:0010975, GO:0071241,<br>GO:0032147, GO:0070849,<br>GO:0048017, GO:1905475,<br>GO:0009308, GO:0032102 |      |                           |      |      |
| Mean<br>Corpuscular<br>Hemoglobin | GO:0044772, GO:0048285,<br>GO:0051052, GO:1901987,<br>GO:0045787, GO:0007059,<br>GO:0010948, GO:0006310,<br>GO:0006260, GO:0045930,<br>GO:0044843, GO:0071103,<br>GO:0000075, GO:0044839,<br>GO:1902850, GO:0033044,<br>GO:0051321, GO:0007051,<br>GO:0071824, GO:0010639,<br>GO:0034502, GO:0006333,<br>GO:0061641, GO:0000910,<br>GO:0051383, GO:0032200,<br>GO:0006338, GO:0006302,<br>GO:0042110, GO:0050000,<br>GO:0002200, GO:0031023,<br>GO:0072331, GO:0042770,<br>GO:1904029, GO:0071897,<br>GO:0050867, GO:0032886,<br>GO:0002521, GO:2001020,                                                                                                                                                                                                                                                                                                                                                                                                                                                                                                                                                                                                                                                                                                                                                                                                               | Null | GO:0036230,<br>GO:0002446 | Null | Null |

|                  |                                                                                                                                                                                                                                                                                                                                                                                                                                                                                                                                                                                                                                                                                                                                                                                                                                                                                                                                                                                                                                                                                                                                                                                                                                                                                                                                                                                                                                                                                                                |                                                                                                                                                                                                                              |      |            |                                                                                                      |
|------------------|----------------------------------------------------------------------------------------------------------------------------------------------------------------------------------------------------------------------------------------------------------------------------------------------------------------------------------------------------------------------------------------------------------------------------------------------------------------------------------------------------------------------------------------------------------------------------------------------------------------------------------------------------------------------------------------------------------------------------------------------------------------------------------------------------------------------------------------------------------------------------------------------------------------------------------------------------------------------------------------------------------------------------------------------------------------------------------------------------------------------------------------------------------------------------------------------------------------------------------------------------------------------------------------------------------------------------------------------------------------------------------------------------------------------------------------------------------------------------------------------------------------|------------------------------------------------------------------------------------------------------------------------------------------------------------------------------------------------------------------------------|------|------------|------------------------------------------------------------------------------------------------------|
|                  | GO:0051098, GO:0060249,<br>GO:0032069, GO:0009262,<br>GO:0002694, GO:1903829,<br>GO:0051302, GO:0022407,<br>GO:0051493, GO:0022616,<br>GO:0007050, GO:0045785,<br>GO:0048872, GO:0002250,<br>GO:0007159, GO:0007018,<br>GO:0045023, GO:0006298,<br>GO:0042769, GO:0036297,<br>GO:0006289, GO:0019692,<br>GO:0051169, GO:0006403,<br>GO:0040029, GO:0042113,<br>GO:0006997, GO:0008380,<br>GO:0009112                                                                                                                                                                                                                                                                                                                                                                                                                                                                                                                                                                                                                                                                                                                                                                                                                                                                                                                                                                                                                                                                                                           |                                                                                                                                                                                                                              |      |            |                                                                                                      |
| Neutrophil count | GO:0036230, GO:0002446,<br>GO:0002521, GO:0002764,<br>GO:0002694, GO:0006909,<br>GO:0019882, GO:0042110,<br>GO:0007015, GO:0034341,<br>GO:0051051, GO:0050867,<br>GO:0002250, GO:0045088,<br>GO:0042113, GO:0030099,<br>GO:0060627, GO:0007159,<br>GO:0071706, GO:0031349,<br>GO:0032970, GO:0070661,<br>GO:0001819, GO:1903706,<br>GO:0051493, GO:0045785,<br>GO:1902903, GO:0002237,<br>GO:0022407, GO:0002449,<br>GO:0001818, GO:1901652,<br>GO:0051090, GO:0007249,<br>GO:0051258, GO:0052547,<br>GO:0006898, GO:0002697,<br>GO:0050727, GO:0071216,<br>GO:0002576, GO:0072593,<br>GO:0045576, GO:0032635,<br>GO:0002683, GO:0043254,<br>GO:0022604, GO:2001233,<br>GO:0032606, GO:0010324,<br>GO:0007162, GO:0070671,<br>GO:0007229, GO:0002440,<br>GO:0002285, GO:0050817,<br>GO:0090066, GO:1904950,<br>GO:0050900, GO:0071887,<br>GO:0051098, GO:0032418,<br>GO:0072524, GO:0009141,<br>GO:0010959, GO:0002448,<br>GO:0031589, GO:0042116,<br>GO:0042326, GO:0050866,<br>GO:0032103, GO:0032612,<br>GO:0042107, GO:0045862,<br>GO:1902532, GO:0002532,<br>GO:0034109, GO:0048010,<br>GO:0032623, GO:0050663,<br>GO:0050690, GO:0050878,<br>GO:1904951, GO:0061919,<br>GO:0016052, GO:0031348,<br>GO:0032386, GO:0097193,<br>GO:0071900, GO:0098542,<br>GO:0009123, GO:1990778,<br>GO:0033002, GO:0043112,<br>GO:2000147, GO:0006091,<br>GO:0048013, GO:0032613,<br>GO:0150076, GO:0032633,<br>GO:0002791, GO:0007033,<br>GO:0048872, GO:0051346,<br>GO:0070997, GO:0035690,<br>GO:0140029, GO:0045730, | GO:0048872,<br>GO:0002521,<br>GO:0071216,<br>GO:0006909,<br>GO:0071887,<br>GO:1903706,<br>GO:0050900,<br>GO:0042110,<br>GO:0007159,<br>GO:0006338,<br>GO:2001233,<br>GO:0002683,<br>GO:0045785,<br>GO:0030099,<br>GO:0002694 | Null | GO:0050900 | GO:0019882,<br>GO:0034341,<br>GO:0001819,<br>GO:0002764,<br>GO:0002697,<br>GO:0001906,<br>GO:0002683 |

|                                                                                                                                                                                                                                                                                                                                                                                                                                                                                                                                                                                                                                                                                                                                                                                                                                                                                                                                                                                                                                                                                                                                                                                                                                                |  |  |  |  |
|------------------------------------------------------------------------------------------------------------------------------------------------------------------------------------------------------------------------------------------------------------------------------------------------------------------------------------------------------------------------------------------------------------------------------------------------------------------------------------------------------------------------------------------------------------------------------------------------------------------------------------------------------------------------------------------------------------------------------------------------------------------------------------------------------------------------------------------------------------------------------------------------------------------------------------------------------------------------------------------------------------------------------------------------------------------------------------------------------------------------------------------------------------------------------------------------------------------------------------------------|--|--|--|--|
| GO:0043900, GO:0032615,<br>GO:0002269, GO:1905475,<br>GO:0032602, GO:0051348,<br>GO:0060326, GO:0031529,<br>GO:0032637, GO:0007568,<br>GO:0003012, GO:1902600,<br>GO:2001057, GO:0090662,<br>GO:0006907, GO:0071800,<br>GO:0097242, GO:0034330,<br>GO:0051235, GO:0060759,<br>GO:0042176, GO:0061351,<br>GO:0097191, GO:0016049,<br>GO:0070371, GO:0022406,<br>GO:0007265, GO:0031532,<br>GO:0001906, GO:0016197,<br>GO:0032609, GO:1903829,<br>GO:0071496, GO:0009615,<br>GO:0051047, GO:0019058,<br>GO:0034340, GO:0007034,<br>GO:0031099, GO:0038061,<br>GO:0038127, GO:0051701,<br>GO:0045861, GO:0016050,<br>GO:0006959, GO:0097581,<br>GO:0018212, GO:0006968,<br>GO:0051156, GO:0031098,<br>GO:0006979, GO:0001667,<br>GO:0006090, GO:0097006,<br>GO:0009636, GO:0008637,<br>GO:0046939, GO:0034612,<br>GO:0051271, GO:0042063,<br>GO:0099132, GO:0046677,<br>GO:0014812, GO:0031579,<br>GO:1903828, GO:0043270,<br>GO:0010821, GO:0048771,<br>GO:0009259, GO:0009266,<br>GO:0042092, GO:0009743,<br>GO:0055076, GO:0032102,<br>GO:0098876, GO:1901342,<br>GO:0001773, GO:0046434,<br>GO:0030865, GO:0072512,<br>GO:0097305, GO:0034404,<br>GO:0009132, GO:0001525,<br>GO:0009896, GO:0104004,<br>GO:1901136, GO:0090130,<br>GO:0070849 |  |  |  |  |
|------------------------------------------------------------------------------------------------------------------------------------------------------------------------------------------------------------------------------------------------------------------------------------------------------------------------------------------------------------------------------------------------------------------------------------------------------------------------------------------------------------------------------------------------------------------------------------------------------------------------------------------------------------------------------------------------------------------------------------------------------------------------------------------------------------------------------------------------------------------------------------------------------------------------------------------------------------------------------------------------------------------------------------------------------------------------------------------------------------------------------------------------------------------------------------------------------------------------------------------------|--|--|--|--|

|                          |                                                                                                                                                                                                                                                                                                                                                                                                                                                                                                                                                                                                                                                                                                                                                                                                                                                                                                                                                                                                                                                                                                                                                                                                                                                                                                                                                                                                    |                                                                                                      |      |      |            |
|--------------------------|----------------------------------------------------------------------------------------------------------------------------------------------------------------------------------------------------------------------------------------------------------------------------------------------------------------------------------------------------------------------------------------------------------------------------------------------------------------------------------------------------------------------------------------------------------------------------------------------------------------------------------------------------------------------------------------------------------------------------------------------------------------------------------------------------------------------------------------------------------------------------------------------------------------------------------------------------------------------------------------------------------------------------------------------------------------------------------------------------------------------------------------------------------------------------------------------------------------------------------------------------------------------------------------------------------------------------------------------------------------------------------------------------|------------------------------------------------------------------------------------------------------|------|------|------------|
| Hemoglobin concentration | GO:0036230, GO:0002446,<br>GO:0044772, GO:0007059,<br>GO:0006260, GO:0071103,<br>GO:0009141, GO:0051052,<br>GO:0009123, GO:0006091,<br>GO:1901987, GO:0033044,<br>GO:0048285, GO:0044843,<br>GO:0006338, GO:0044839,<br>GO:0071824, GO:0032200,<br>GO:0006403, GO:0006333,<br>GO:0034502, GO:0140053,<br>GO:0010948, GO:0006310,<br>GO:0045787, GO:0033108,<br>GO:0071897, GO:0010257,<br>GO:1902850, GO:0006414,<br>GO:0051383, GO:0061641,<br>GO:0019882, GO:0009259,<br>GO:0000075, GO:0032984,<br>GO:0007051, GO:0051169,<br>GO:0010639, GO:0008380,<br>GO:0045930, GO:0050000,<br>GO:0006397, GO:0006979,<br>GO:0006457, GO:0015931,<br>GO:0050867, GO:1904951,<br>GO:0060249, GO:0045023,<br>GO:0042769, GO:0072593,<br>GO:0051321, GO:0016999,<br>GO:1903829, GO:0006302,<br>GO:0009636, GO:0009262,<br>GO:0042770, GO:1901657,<br>GO:2001020, GO:0046677,<br>GO:0006839, GO:0006909,<br>GO:0010608, GO:0070585,<br>GO:0015949, GO:0009895,<br>GO:0006081, GO:0034404,<br>GO:0048144, GO:0070646,<br>GO:1990823, GO:0008637,<br>GO:0006401, GO:0022613,<br>GO:0018205, GO:0043687,<br>GO:0072524, GO:0022616,<br>GO:0034504, GO:0070661,<br>GO:0040029, GO:0051098,<br>GO:0016569, GO:0044282,<br>GO:0045454, GO:0002764,<br>GO:1904029, GO:0000910,<br>GO:2001233, GO:0010498,<br>GO:0071166, GO:0071706,<br>GO:0019692, GO:0072331,<br>GO:1903311, GO:0097066,<br>GO:0031647, GO:0042113, | GO:0048706,<br>GO:0048568,<br>GO:0002521,<br>GO:0048872,<br>GO:0061448,<br>GO:0061614,<br>GO:0033044 | Null | Null | GO:0019882 |
|--------------------------|----------------------------------------------------------------------------------------------------------------------------------------------------------------------------------------------------------------------------------------------------------------------------------------------------------------------------------------------------------------------------------------------------------------------------------------------------------------------------------------------------------------------------------------------------------------------------------------------------------------------------------------------------------------------------------------------------------------------------------------------------------------------------------------------------------------------------------------------------------------------------------------------------------------------------------------------------------------------------------------------------------------------------------------------------------------------------------------------------------------------------------------------------------------------------------------------------------------------------------------------------------------------------------------------------------------------------------------------------------------------------------------------------|------------------------------------------------------------------------------------------------------|------|------|------------|



|                   |                                                                                                                                                                                                                                                                                                                                                                                                                                                                                                                                                                                                                                                                                                                                                                                                                                                                                                                                                                                                                                                                                                                                                                                                                                                                                                                                                                                                                                                                                                                                                                                                                                                                                                                                                                                                                                                                                                                                     |                                                                                                                                                   |      |                           |                                                                                                                                                                                                                                                                                                                        |
|-------------------|-------------------------------------------------------------------------------------------------------------------------------------------------------------------------------------------------------------------------------------------------------------------------------------------------------------------------------------------------------------------------------------------------------------------------------------------------------------------------------------------------------------------------------------------------------------------------------------------------------------------------------------------------------------------------------------------------------------------------------------------------------------------------------------------------------------------------------------------------------------------------------------------------------------------------------------------------------------------------------------------------------------------------------------------------------------------------------------------------------------------------------------------------------------------------------------------------------------------------------------------------------------------------------------------------------------------------------------------------------------------------------------------------------------------------------------------------------------------------------------------------------------------------------------------------------------------------------------------------------------------------------------------------------------------------------------------------------------------------------------------------------------------------------------------------------------------------------------------------------------------------------------------------------------------------------------|---------------------------------------------------------------------------------------------------------------------------------------------------|------|---------------------------|------------------------------------------------------------------------------------------------------------------------------------------------------------------------------------------------------------------------------------------------------------------------------------------------------------------------|
| Basophil<br>count | GO:0036230, GO:0002446,<br>GO:0002521, GO:0002764,<br>GO:0002694, GO:0042110,<br>GO:0031349, GO:0001819,<br>GO:0002250, GO:0030099,<br>GO:0045088, GO:0007159,<br>GO:0050867, GO:0006909,<br>GO:0034341, GO:0002237,<br>GO:1903706, GO:0070661,<br>GO:0045785, GO:0007015,<br>GO:0022407, GO:0019882,<br>GO:0071216, GO:0071706,<br>GO:0042113, GO:0051051,<br>GO:0007249, GO:0002697,<br>GO:0060627, GO:0001818,<br>GO:1901652, GO:0032970,<br>GO:0002285, GO:0050727,<br>GO:0051090, GO:0098542,<br>GO:0032635, GO:0045576,<br>GO:0032103, GO:0071900,<br>GO:0002683, GO:0022604,<br>GO:0050900, GO:0002449,<br>GO:0050663, GO:1902903,<br>GO:0051493, GO:0071496,<br>GO:0002576, GO:2000147,<br>GO:0002532, GO:0072593,<br>GO:0050817, GO:0007162,<br>GO:0051258, GO:0050866,<br>GO:0032612, GO:0032606,<br>GO:2001233, GO:0002448,<br>GO:0052547, GO:0007229,<br>GO:0032637, GO:0042107,<br>GO:0032418, GO:1902532,<br>GO:0071887, GO:0042116,<br>GO:0070482, GO:0097193,<br>GO:0006898, GO:0060326,<br>GO:0051098, GO:0043254,<br>GO:0050878, GO:0072524,<br>GO:0090066, GO:0031589,<br>GO:0042326, GO:0032602,<br>GO:0070997, GO:0001667,<br>GO:0070371, GO:0090130,<br>GO:0006979, GO:0033002,<br>GO:0061919, GO:0032615,<br>GO:0010959, GO:0035690,<br>GO:0032633, GO:0032613,<br>GO:0150076, GO:0002440,<br>GO:0007265, GO:0048013,<br>GO:0048872, GO:0002791,<br>GO:0048771, GO:0042092,<br>GO:0045730, GO:0046677,<br>GO:0031098, GO:0009615,<br>GO:0038061, GO:1904951,<br>GO:0045862, GO:0010324,<br>GO:0071800, GO:0031529,<br>GO:0048010, GO:0060759,<br>GO:0090662, GO:0032609,<br>GO:0016052, GO:2001057,<br>GO:0010573, GO:1904950,<br>GO:0007033, GO:0009595,<br>GO:0051047, GO:0007568,<br>GO:0001773, GO:0009636,<br>GO:0018212, GO:0051056,<br>GO:0034330, GO:0104004,<br>GO:0051235, GO:0031348,<br>GO:0072512, GO:0002269,<br>GO:0048871, GO:0031667,<br>GO:0034340, GO:0032623,<br>GO:0009141, GO:0006968, | GO:0036230,<br>GO:0002446,<br>GO:0030099,<br>GO:0002521,<br>GO:0006909,<br>GO:0048872,<br>GO:0045785,<br>GO:0050900,<br>GO:1903706,<br>GO:0043112 | Null | GO:0036230,<br>GO:0002446 | GO:0019882,<br>GO:0002764,<br>GO:0036230,<br>GO:0034341,<br>GO:0002446,<br>GO:0006909,<br>GO:0051090,<br>GO:0001906,<br>GO:0031349,<br>GO:0030099,<br>GO:0045785,<br>GO:0060326,<br>GO:0050900,<br>GO:0002521,<br>GO:0045088,<br>GO:1903706,<br>GO:0022407,<br>GO:0002237,<br>GO:0009620,<br>GO:0052192,<br>GO:0002683 |
|-------------------|-------------------------------------------------------------------------------------------------------------------------------------------------------------------------------------------------------------------------------------------------------------------------------------------------------------------------------------------------------------------------------------------------------------------------------------------------------------------------------------------------------------------------------------------------------------------------------------------------------------------------------------------------------------------------------------------------------------------------------------------------------------------------------------------------------------------------------------------------------------------------------------------------------------------------------------------------------------------------------------------------------------------------------------------------------------------------------------------------------------------------------------------------------------------------------------------------------------------------------------------------------------------------------------------------------------------------------------------------------------------------------------------------------------------------------------------------------------------------------------------------------------------------------------------------------------------------------------------------------------------------------------------------------------------------------------------------------------------------------------------------------------------------------------------------------------------------------------------------------------------------------------------------------------------------------------|---------------------------------------------------------------------------------------------------------------------------------------------------|------|---------------------------|------------------------------------------------------------------------------------------------------------------------------------------------------------------------------------------------------------------------------------------------------------------------------------------------------------------------|

|                    |                                                                                                                                                                                                                                                                                                                                                                                                                                                                                                                                                                                                                                                                                                                                                                                                                                                                                                                                                                                                                                                   |                                                                                                                                                                                                                                                                                                                                                                                                                   |      |      |                                                                        |
|--------------------|---------------------------------------------------------------------------------------------------------------------------------------------------------------------------------------------------------------------------------------------------------------------------------------------------------------------------------------------------------------------------------------------------------------------------------------------------------------------------------------------------------------------------------------------------------------------------------------------------------------------------------------------------------------------------------------------------------------------------------------------------------------------------------------------------------------------------------------------------------------------------------------------------------------------------------------------------------------------------------------------------------------------------------------------------|-------------------------------------------------------------------------------------------------------------------------------------------------------------------------------------------------------------------------------------------------------------------------------------------------------------------------------------------------------------------------------------------------------------------|------|------|------------------------------------------------------------------------|
|                    | GO:0000041, GO:0043900,<br>GO:0009620, GO:0043112,<br>GO:0035456, GO:0038127,<br>GO:0032147, GO:0051346,<br>GO:0051701, GO:0070671,<br>GO:0140029, GO:0043087,<br>GO:0006959, GO:0032386,<br>GO:0097305, GO:1905475,<br>GO:0099132, GO:0001906,<br>GO:0031532, GO:0043620,<br>GO:0050690, GO:1990845,<br>GO:0034612, GO:0003012,<br>GO:0001525, GO:0045861,<br>GO:0032620, GO:0009612,<br>GO:0042063, GO:0051348,<br>GO:0097581, GO:0061351,<br>GO:0051156, GO:0016049,<br>GO:0046939, GO:0033028,<br>GO:0070265, GO:0031099,<br>GO:0034109, GO:0071241,<br>GO:1901136, GO:0014812,<br>GO:0010038, GO:0001562,<br>GO:0031579, GO:0097242,<br>GO:0010657, GO:0001101,<br>GO:0048017, GO:0016197,<br>GO:0009743, GO:0046777,<br>GO:0071402, GO:0071559,<br>GO:0048545, GO:1901342,<br>GO:0051271, GO:0006090,<br>GO:1903829, GO:0050769,<br>GO:0031032, GO:0034404,<br>GO:0097191, GO:0070555,<br>GO:0010975, GO:0009132,<br>GO:0009123, GO:0072511,<br>GO:0070849, GO:0019058,<br>GO:0032102, GO:0009266,<br>GO:0016050, GO:1990778,<br>GO:0032616 |                                                                                                                                                                                                                                                                                                                                                                                                                   |      |      |                                                                        |
| Lymphocyte percent | GO:0044772, GO:0009141,<br>GO:0071103, GO:0009123,<br>GO:0007059, GO:0071824,<br>GO:0006338, GO:0008380,<br>GO:0006260, GO:0006091,<br>GO:0006333, GO:0033044,<br>GO:0006397, GO:0034502,<br>GO:1901987, GO:0036230,<br>GO:0006457, GO:0002446,<br>GO:0051169, GO:0032200,<br>GO:1902850, GO:0006403,<br>GO:0048285, GO:0071897,<br>GO:0044839, GO:0044843,<br>GO:0010608, GO:0010257,<br>GO:1903829, GO:0009259,<br>GO:0042113, GO:0051383,<br>GO:0019882, GO:0010948,<br>GO:0007051, GO:0061641,<br>GO:0051052, GO:0033108,<br>GO:1903311, GO:0031647,<br>GO:0006310, GO:0045787,<br>GO:0070661, GO:1904951,<br>GO:0034504, GO:0010639,<br>GO:0045023, GO:0002764,<br>GO:0010498, GO:0051098,<br>GO:0042769, GO:0000075,<br>GO:0071166, GO:0009262,<br>GO:0031503, GO:0042176,                                                                                                                                                                                                                                                                  | GO:0002521,<br>GO:0030099,<br>GO:1903706,<br>GO:0042110,<br>GO:1903829,<br>GO:0042113,<br>GO:0061919,<br>GO:0006909,<br>GO:0002683,<br>GO:0001819,<br>GO:0036230,<br>GO:0010821,<br>GO:0071216,<br>GO:1990868,<br>GO:0002244,<br>GO:0050867,<br>GO:0002237,<br>GO:0022407,<br>GO:1904951,<br>GO:0048872,<br>GO:0002694,<br>GO:0002446,<br>GO:0045785,<br>GO:0070585,<br>GO:0007159,<br>GO:0002285,<br>GO:0097191, | Null | Null | GO:0042110,<br>GO:0002521,<br>GO:0002237,<br>GO:0034341,<br>GO:0002764 |

|                  |                                                                                                                                                                                                                                                                                                                                                                                                                                                                                                                                                                                                                                                                                                                                                                                                                                                                                                                                                                                                                                                                                                                                                                                                                                                                                        |                                                                                                                                                                                                                                                                                                                                       |      |            |                                                                                                                                                                                                                                                                                                                                                      |
|------------------|----------------------------------------------------------------------------------------------------------------------------------------------------------------------------------------------------------------------------------------------------------------------------------------------------------------------------------------------------------------------------------------------------------------------------------------------------------------------------------------------------------------------------------------------------------------------------------------------------------------------------------------------------------------------------------------------------------------------------------------------------------------------------------------------------------------------------------------------------------------------------------------------------------------------------------------------------------------------------------------------------------------------------------------------------------------------------------------------------------------------------------------------------------------------------------------------------------------------------------------------------------------------------------------|---------------------------------------------------------------------------------------------------------------------------------------------------------------------------------------------------------------------------------------------------------------------------------------------------------------------------------------|------|------------|------------------------------------------------------------------------------------------------------------------------------------------------------------------------------------------------------------------------------------------------------------------------------------------------------------------------------------------------------|
|                  | GO:0006979, GO:0070585,<br>GO:0060249, GO:0015931,<br>GO:0045930, GO:0034248,<br>GO:0009266, GO:0006289,<br>GO:0006081, GO:0045862,<br>GO:0048144, GO:0045454,<br>GO:0043687, GO:0006301,<br>GO:0008637, GO:0046677,<br>GO:0050000, GO:0040029,<br>GO:0006839, GO:0006909,<br>GO:0052547, GO:0019058,<br>GO:0019080, GO:0050867,<br>GO:0070646, GO:0042770,<br>GO:0022616, GO:1901998,<br>GO:0032606, GO:0006401,<br>GO:0016999, GO:0051051,<br>GO:1902579, GO:0032984,<br>GO:0048010, GO:0032418,<br>GO:0019692, GO:0006302,<br>GO:0006354, GO:0090559,<br>GO:0031123, GO:1901657,<br>GO:0072593, GO:0071826,<br>GO:0010821, GO:0002250                                                                                                                                                                                                                                                                                                                                                                                                                                                                                                                                                                                                                                               | GO:0060759,<br>GO:1901652                                                                                                                                                                                                                                                                                                             |      |            |                                                                                                                                                                                                                                                                                                                                                      |
| White blood cell | GO:0036230, GO:0002446,<br>GO:0002521, GO:0002764,<br>GO:0002694, GO:0007015,<br>GO:0006909, GO:0034341,<br>GO:0019882, GO:0051051,<br>GO:0030099, GO:0045088,<br>GO:0002250, GO:0050867,<br>GO:0042110, GO:0001819,<br>GO:0042113, GO:0031349,<br>GO:0060627, GO:0070661,<br>GO:0071706, GO:0032970,<br>GO:0007159, GO:1903706,<br>GO:0002237, GO:0051493,<br>GO:0002697, GO:1902903,<br>GO:0001818, GO:0002449,<br>GO:1901652, GO:0071216,<br>GO:0045785, GO:0050727,<br>GO:0022407, GO:0051090,<br>GO:0002683, GO:0002576,<br>GO:0051258, GO:0032635,<br>GO:0002440, GO:0050900,<br>GO:0007249, GO:0032103,<br>GO:0022604, GO:0002285,<br>GO:0050817, GO:0072593,<br>GO:0043254, GO:2001233,<br>GO:0006898, GO:0045576,<br>GO:0032606, GO:0052547,<br>GO:1902532, GO:0071900,<br>GO:0090066, GO:2000147,<br>GO:0007162, GO:0002532,<br>GO:0007229, GO:0072524,<br>GO:0051098, GO:0050663,<br>GO:0050878, GO:0042116,<br>GO:0097193, GO:1904950,<br>GO:0032612, GO:0042107,<br>GO:0042326, GO:0071887,<br>GO:0009141, GO:0032418,<br>GO:0048872, GO:0031589,<br>GO:0060326, GO:0002448,<br>GO:1904951, GO:0098542,<br>GO:0050866, GO:0010959,<br>GO:0016052, GO:0010324,<br>GO:0002791, GO:0035690,<br>GO:0034109, GO:0032623,<br>GO:0032602, GO:0032637,<br>GO:0043112, GO:0070997, | GO:0048872,<br>GO:0002521,<br>GO:2001233,<br>GO:0050900,<br>GO:0006909,<br>GO:0042110,<br>GO:0042113,<br>GO:0002694,<br>GO:0030099,<br>GO:0009612,<br>GO:0002237,<br>GO:0097191,<br>GO:0022407,<br>GO:0007159,<br>GO:0001819,<br>GO:0045785,<br>GO:0071216,<br>GO:0097193,<br>GO:0002285,<br>GO:0070482,<br>GO:0071887,<br>GO:0010821 | Null | GO:0006909 | GO:0019882,<br>GO:0034341,<br>GO:0001819,<br>GO:0042110,<br>GO:0070661,<br>GO:0002764,<br>GO:0002697,<br>GO:0006909,<br>GO:0001906,<br>GO:0002694,<br>GO:0022407,<br>GO:0045785,<br>GO:0034340,<br>GO:0007159,<br>GO:0002449,<br>GO:0002521,<br>GO:0048872,<br>GO:0002683,<br>GO:0060326,<br>GO:0006352,<br>GO:0050900,<br>GO:0031349,<br>GO:1903706 |

|                  |                                                                                                                                                                                                                                                                                                                                                                                                                                                                                                                                                                                                                                                                                                                                                                                                                                                                                                                                                                                                                                                                                                                                                                                                                                                                                                                                                                                                                                                                                                                                                                                                                                                                     |      |            |      |      |
|------------------|---------------------------------------------------------------------------------------------------------------------------------------------------------------------------------------------------------------------------------------------------------------------------------------------------------------------------------------------------------------------------------------------------------------------------------------------------------------------------------------------------------------------------------------------------------------------------------------------------------------------------------------------------------------------------------------------------------------------------------------------------------------------------------------------------------------------------------------------------------------------------------------------------------------------------------------------------------------------------------------------------------------------------------------------------------------------------------------------------------------------------------------------------------------------------------------------------------------------------------------------------------------------------------------------------------------------------------------------------------------------------------------------------------------------------------------------------------------------------------------------------------------------------------------------------------------------------------------------------------------------------------------------------------------------|------|------------|------|------|
|                  | GO:0031348, GO:0032386,<br>GO:0071496, GO:0038061,<br>GO:0071800, GO:0032615,<br>GO:0070371, GO:0048010,<br>GO:0061351, GO:0060759,<br>GO:0031098, GO:0090130,<br>GO:0061919, GO:0051701,<br>GO:0048013, GO:0007265,<br>GO:0032613, GO:0150076,<br>GO:0043900, GO:0010573,<br>GO:0032633, GO:0051235,<br>GO:0009123, GO:0001667,<br>GO:0070671, GO:0006979,<br>GO:1990778, GO:0070482,<br>GO:0033002, GO:0140029,<br>GO:0038127, GO:1903829,<br>GO:0045862, GO:0045730,<br>GO:0031532, GO:0032609,<br>GO:1905475, GO:0002269,<br>GO:0051348, GO:0001906,<br>GO:0007033, GO:0031529,<br>GO:0016049, GO:0007568,<br>GO:0034340, GO:2001057,<br>GO:0009615, GO:0009620,<br>GO:0090662, GO:0019058,<br>GO:0034330, GO:0051047,<br>GO:0006907, GO:0051346,<br>GO:0048771, GO:0018212,<br>GO:0006090, GO:0046677,<br>GO:0016197, GO:0046939,<br>GO:1902600, GO:0104004,<br>GO:0001773, GO:0050690,<br>GO:0046434, GO:0003012,<br>GO:0031099, GO:0034404,<br>GO:0042063, GO:0051271,<br>GO:0006959, GO:0097191,<br>GO:0097581, GO:0006968,<br>GO:0051156, GO:0022406,<br>GO:0009636, GO:0010975,<br>GO:0035456, GO:0016050,<br>GO:1901342, GO:0009132,<br>GO:0099132, GO:0097305,<br>GO:0006091, GO:1901136,<br>GO:0014812, GO:0050769,<br>GO:1903828, GO:0031579,<br>GO:0097242, GO:0010821,<br>GO:0001525, GO:0009743,<br>GO:0055076, GO:0042092,<br>GO:0045861, GO:0032102,<br>GO:0034612, GO:0040013,<br>GO:0006732, GO:0030865,<br>GO:0009595, GO:0005996,<br>GO:0008637, GO:0009259,<br>GO:0051056, GO:0072512,<br>GO:0097006, GO:0010721,<br>GO:0071241, GO:0043270,<br>GO:0032147, GO:0070849,<br>GO:0048017, GO:0000041,<br>GO:0009308, GO:0031346,<br>GO:0032616 |      |            |      |      |
| Lymphocyte count | GO:0002521, GO:0002694,<br>GO:0042110, GO:0022407,<br>GO:0002250, GO:0007159,<br>GO:0050867, GO:0002449,<br>GO:0045785, GO:0070661,<br>GO:0002285, GO:0032609,<br>GO:1903706, GO:0048872,<br>GO:0001819, GO:0002440,<br>GO:0001818, GO:0032633,                                                                                                                                                                                                                                                                                                                                                                                                                                                                                                                                                                                                                                                                                                                                                                                                                                                                                                                                                                                                                                                                                                                                                                                                                                                                                                                                                                                                                     | Null | GO:0051235 | Null | Null |

|                  |                                                                                                                                                                                                                                                                                                                                                                                                                                                                                                                                                                                                                                                             |                                                                                                                                                                                                                                                                                                                                                                                                                                                                                                                                                                                                                                                             |                                                                                                                                                                                                                                                                                                                                                                                                                                                                                                            |      |      |                                                                                                                                                                                                                                                                                                                                                                                                                                                                                                                                    |
|------------------|-------------------------------------------------------------------------------------------------------------------------------------------------------------------------------------------------------------------------------------------------------------------------------------------------------------------------------------------------------------------------------------------------------------------------------------------------------------------------------------------------------------------------------------------------------------------------------------------------------------------------------------------------------------|-------------------------------------------------------------------------------------------------------------------------------------------------------------------------------------------------------------------------------------------------------------------------------------------------------------------------------------------------------------------------------------------------------------------------------------------------------------------------------------------------------------------------------------------------------------------------------------------------------------------------------------------------------------|------------------------------------------------------------------------------------------------------------------------------------------------------------------------------------------------------------------------------------------------------------------------------------------------------------------------------------------------------------------------------------------------------------------------------------------------------------------------------------------------------------|------|------|------------------------------------------------------------------------------------------------------------------------------------------------------------------------------------------------------------------------------------------------------------------------------------------------------------------------------------------------------------------------------------------------------------------------------------------------------------------------------------------------------------------------------------|
|                  | GO:0002697, GO:0002683, GO:0050727, GO:0002764, GO:0002437, GO:0002200, GO:0030099, GO:0050866, GO:0032623, GO:0030101, GO:0032613, GO:0032103, GO:0002791, GO:0032615, GO:0042107, GO:0050690                                                                                                                                                                                                                                                                                                                                                                                                                                                              | GO:0042113, GO:0001906, GO:0002507, GO:0051056, GO:0031349, GO:0050900, GO:1902532, GO:0043087, GO:0032620, GO:0009615, GO:0007265, GO:0051348, GO:0070670, GO:0042326, GO:0019216                                                                                                                                                                                                                                                                                                                                                                                                                                                                          |                                                                                                                                                                                                                                                                                                                                                                                                                                                                                                            |      |      |                                                                                                                                                                                                                                                                                                                                                                                                                                                                                                                                    |
| Eosinophil count | GO:0036230, GO:0002521, GO:0002694, GO:0031349, GO:0007015, GO:0030099, GO:0050867, GO:0042113, GO:0019882, GO:0007159, GO:0051051, GO:0002237, GO:0002697, GO:1902903, GO:0045785, GO:0007249, GO:0001818, GO:0032103, GO:0051493, GO:0002683, GO:0032635, GO:0051090, GO:0050817, GO:0002440, GO:0043254, GO:0090066, GO:0072593, GO:0032606, GO:0050663, GO:0042107, GO:0098542, GO:0052547, GO:0031098, GO:0032612, GO:0051098, GO:0071887, GO:0032418, GO:0002791, GO:0071496, GO:0031589, GO:0002448, GO:0048010, GO:0010959, GO:0018212, GO:1904951, GO:0032615, GO:0038061, GO:0050866, GO:0032623, GO:0032609, GO:0045730, GO:0051235, GO:0071800, | GO:0002446, GO:0002764, GO:0042110, GO:0001819, GO:0002250, GO:0045088, GO:0006909, GO:0034341, GO:0071706, GO:0070661, GO:0060627, GO:1903706, GO:0032970, GO:0071216, GO:0022407, GO:1901652, GO:0050727, GO:0002449, GO:0071900, GO:0051258, GO:0002285, GO:0022604, GO:0050900, GO:0006898, GO:2000147, GO:0002576, GO:0045576, GO:1902532, GO:2001233, GO:0002532, GO:0042116, GO:0032637, GO:0007162, GO:0060326, GO:0050878, GO:0010324, GO:0072524, GO:0097193, GO:0032613, GO:0042326, GO:1904950, GO:0070371, GO:0006959, GO:0007265, GO:0016052, GO:0007229, GO:0032633, GO:0150076, GO:0032602, GO:0070997, GO:0104004, GO:0048872, GO:0007568, | GO:0002521, GO:0042110, GO:0002694, GO:0050867, GO:0007159, GO:0002285, GO:0022407, GO:1903706, GO:0030099, GO:0150076, GO:0001773, GO:0050727, GO:0042092, GO:0007162, GO:0097193, GO:0042107, GO:0042113, GO:0002683, GO:0045785, GO:0001819, GO:0032633, GO:0045862, GO:0050900, GO:0009896, GO:0002764, GO:0006338, GO:0002250, GO:0097191, GO:0002440, GO:0032623, GO:0034612, GO:0002244, GO:0061919, GO:0002697, GO:0104004, GO:0071887, GO:0050663, GO:0006909, GO:0038034, GO:0050866, GO:2001233 | Null | Null | GO:0002521, GO:0042110, GO:0002694, GO:0034341, GO:0002449, GO:0050867, GO:0002250, GO:0001819, GO:0002764, GO:1903706, GO:0002697, GO:0002683, GO:0150076, GO:0007159, GO:0050727, GO:0019882, GO:0022407, GO:0045088, GO:0031349, GO:0030099, GO:0002440, GO:0034340, GO:0002269, GO:0045785, GO:0048872, GO:0098542, GO:0097191, GO:0002285, GO:0042113, GO:0031348, GO:0001906, GO:0032103, GO:0042116, GO:0070661, GO:0042107, GO:0032615, GO:0032609, GO:0032633, GO:0002437, GO:0042176, GO:0034612, GO:2001233, GO:0045444 |

|                    |                                                                                                                                                                                                                                                                                                                                                                                                                                                                                                                                                                                                                                                                                                                                                                                                                                                                                                                                                                                                                                                                                                                                                                                                                                                                                                                                                                                                                                                                        |                                          |      |      |      |
|--------------------|------------------------------------------------------------------------------------------------------------------------------------------------------------------------------------------------------------------------------------------------------------------------------------------------------------------------------------------------------------------------------------------------------------------------------------------------------------------------------------------------------------------------------------------------------------------------------------------------------------------------------------------------------------------------------------------------------------------------------------------------------------------------------------------------------------------------------------------------------------------------------------------------------------------------------------------------------------------------------------------------------------------------------------------------------------------------------------------------------------------------------------------------------------------------------------------------------------------------------------------------------------------------------------------------------------------------------------------------------------------------------------------------------------------------------------------------------------------------|------------------------------------------|------|------|------|
|                    | GO:0031529, GO:0060759,<br>GO:0090130, GO:0006968,<br>GO:0009615, GO:0048013,<br>GO:0043900, GO:2001057,<br>GO:0001667, GO:0035690,<br>GO:0033002, GO:0042092,<br>GO:0043112, GO:0051056,<br>GO:0051701, GO:0032147,<br>GO:0031348, GO:1905475,<br>GO:0002269, GO:0032386,<br>GO:0009141, GO:0045862,<br>GO:0097581, GO:0051047,<br>GO:0038127, GO:0090662,<br>GO:0034612, GO:0051346,<br>GO:0001562, GO:0006907,<br>GO:0043087, GO:0061919,<br>GO:0140029, GO:0048771,<br>GO:0051348, GO:0001525,<br>GO:0072511, GO:0001906,<br>GO:0031532, GO:0046939,<br>GO:0006979, GO:0009595,<br>GO:0034330, GO:0001773,<br>GO:0050690, GO:0046434,<br>GO:0034340, GO:0000041,<br>GO:0045861, GO:1901342,<br>GO:1990778, GO:0097305,<br>GO:0072512, GO:0046677,<br>GO:0061351, GO:1903829,<br>GO:0051260, GO:0048871,<br>GO:0032616, GO:0051156,<br>GO:0016197, GO:0050769,<br>GO:0016049, GO:0009743,<br>GO:0007033, GO:0009620,<br>GO:0003012, GO:0010975,<br>GO:0006090, GO:0070482,<br>GO:0070671, GO:0009132,<br>GO:0009612, GO:0034404,<br>GO:0099132, GO:0031667,<br>GO:0034109, GO:0097191,<br>GO:0010573, GO:1904019,<br>GO:0031579, GO:0097242,<br>GO:0048017, GO:0002526,<br>GO:0019058, GO:0055076,<br>GO:0034765, GO:0042063,<br>GO:0008037, GO:0005996,<br>GO:0010038, GO:0031032,<br>GO:0071241, GO:0043270,<br>GO:0009123, GO:1901136,<br>GO:0070849, GO:0046777,<br>GO:0009266, GO:0016050,<br>GO:0031346, GO:0051271,<br>GO:0051262, GO:0007163,<br>GO:0006732 |                                          |      |      |      |
| Mean Corpus Volume | GO:0042737, GO:0048872,<br>GO:0051052, GO:0051187,<br>GO:0009636                                                                                                                                                                                                                                                                                                                                                                                                                                                                                                                                                                                                                                                                                                                                                                                                                                                                                                                                                                                                                                                                                                                                                                                                                                                                                                                                                                                                       | GO:0002521,<br>GO:0030099,<br>GO:0034504 | Null | Null | Null |

49  
50  
51

**Supplementary Table S4. Benchmarking analyses of scPagwas with LDSC, MAGMA, and RolyPoly for severe COVID-19-associated immune cell types**

| Cell types        | LDSC-SEG P value | MAGMA P value | RolyPoly P value | scPagwas P value | COVID-19 status |
|-------------------|------------------|---------------|------------------|------------------|-----------------|
| Naïve CD8+T cells | 1.73E-01         | 5.81E-01      | 9.04E-01         | 4.56E-17         | Severe          |
| Megakaryocytes    | 3.55E-01         | 2.36E-02      | 1.80E-02         | 7.82E-06         | Severe          |
| CD16+monocytes    | 3.21E-01         | 1.28E-02      | 3.00E-03         | 1.14E-04         | Severe          |
| Naïve CD4+T cells | 4.87E-01         | 3.36E-01      | 1.14E-01         | 2.54E-03         | Severe          |

|                      |          |          |          |          |          |
|----------------------|----------|----------|----------|----------|----------|
| Na ÷ve B cells       | 4.82E-01 | 3.62E-01 | 4.86E-01 | 4.19E-02 | Severe   |
| NK                   | 6.43E-01 | 1.37E-02 | 8.34E-01 | 1.58E-01 | Severe   |
| Effector CD8+T cells | 4.57E-01 | 3.70E-01 | 9.80E-01 | 2.78E-01 | Severe   |
| Memory CD4 T cells   | 2.20E-01 | 6.00E-01 | 9.60E-01 | 6.02E-01 | Severe   |
| CD34+Progenitors     | 2.42E-01 | 9.38E-01 | 1        | 8.17E-01 | Severe   |
| Dendritic cells      | 5.75E-01 | 5.36E-01 | 4.10E-02 | 9.65E-01 | Severe   |
| CD14+monocytes       | 4.37E-01 | 1.21E-01 | 9.69E-01 | 9.99E-01 | Severe   |
| Mature B cells       | 3.82E-02 | 7.53E-03 | 9.30E-01 | 1        | Severe   |
| Memory CD8+T cells   | 4.68E-01 | 5.16E-01 | 1.40E-02 | 1        | Severe   |
| Na ÷ve CD8+T cells   | 1.92E-01 | 7.97E-01 | 7.70E-02 | 1.98E-22 | Moderate |
| Megakaryocytes       | 2.54E-01 | 6.79E-02 | 3.60E-02 | 9.46E-07 | Moderate |
| CD16+monocytes       | 3.35E-01 | 1.51E-02 | 6.00E-03 | 2.00E-08 | Moderate |
| Na ÷ve CD4+T cells   | 5.00E-01 | 5.86E-01 | 8.48E-01 | 9.07E-03 | Moderate |
| Na ÷ve B cells       | 5.00E-01 | 4.17E-01 | 8.24E-01 | 3.28E-03 | Moderate |
| NK                   | 5.67E-01 | 1.18E-02 | 7.67E-01 | 1.48E-01 | Moderate |
| Effector CD8+T cells | 3.72E-01 | 1.73E-01 | 9.54E-01 | 6.54E-02 | Moderate |
| Memory CD4 T cells   | 8.39E-02 | 5.48E-01 | 8.20E-01 | 5.25E-01 | Moderate |
| CD34+Progenitors     | 7.72E-02 | 7.93E-01 | 9.91E-01 | 9.98E-01 | Moderate |
| Dendritic cells      | 4.06E-01 | 7.35E-02 | 9.00E-03 | 9.32E-01 | Moderate |
| CD14+monocytes       | 4.42E-01 | 2.15E-01 | 1        | 9.99E-01 | Moderate |
| Mature B cells       | 4.35E-01 | 1.57E-02 | 9.87E-01 | 1        | Moderate |
| Memory CD8+T cells   | 2.86E-01 | 2.01E-01 | 3.15E-01 | 1        | Moderate |
| Na ÷ve CD8+T cells   | 7.77E-01 | 3.15E-02 | 1.53E-01 | 7.54E-20 | Mild     |
| Megakaryocytes       | 9.38E-02 | 1.71E-01 | 5.20E-02 | 2.52E-02 | Mild     |
| CD16+monocytes       | 6.31E-02 | 4.27E-02 | 2.90E-02 | 5.39E-06 | Mild     |
| Na ÷ve CD4+T cells   | 2.43E-01 | 4.06E-02 | 6.90E-01 | 1.51E-03 | Mild     |
| Na ÷ve B cells       | 4.98E-01 | 8.11E-01 | 9.58E-01 | 6.00E-02 | Mild     |
| NK                   | 7.47E-01 | 4.60E-02 | 6.82E-01 | 5.14E-03 | Mild     |
| Effector CD8+T cells | 2.19E-01 | 8.20E-02 | 9.96E-01 | 9.17E-01 | Mild     |
| Memory CD4 T cells   | 3.96E-02 | 2.82E-01 | 9.61E-01 | 9.72E-01 | Mild     |
| CD34+Progenitors     | 8.41E-02 | 6.38E-01 | 9.15E-01 | 4.78E-01 | Mild     |
| Dendritic cells      | 5.17E-01 | 4.82E-01 | 2.90E-02 | 1.00E+00 | Mild     |
| CD14+monocytes       | 2.21E-01 | 7.21E-01 | 9.57E-01 | 9.97E-01 | Mild     |
| Mature B cells       | 6.72E-01 | 5.58E-03 | 4.70E-02 | 1        | Mild     |
| Memory CD8+T cells   | 3.42E-01 | 1.46E-01 | 1.84E-01 | 1        | Mild     |
| Na ÷ve CD8+T cells   | 4.88E-01 | 8.71E-02 | 1.71E-01 | 6.56E-01 | Normal   |
| Megakaryocytes       | 4.45E-01 | 1.07E-02 | 4.79E-01 | 8.10E-01 | Normal   |
| CD16+monocytes       | 2.45E-01 | 7.90E-02 | 1.30E-01 | 5.04E-03 | Normal   |
| Na ÷ve CD4+T cells   | 2.54E-01 | 3.75E-01 | 8.06E-01 | 4.91E-22 | Normal   |
| Na ÷ve B cells       | 2.68E-01 | 3.99E-01 | 9.82E-01 | 4.82E-04 | Normal   |
| NK                   | 7.64E-01 | 2.59E-02 | 7.03E-01 | 1.26E-01 | Normal   |
| Effector CD8+T cells | 2.86E-01 | 1.01E-01 | 6.31E-01 | 2.41E-02 | Normal   |
| Memory CD4 T cells   | 3.82E-02 | 7.33E-01 | 8.75E-01 | 9.66E-01 | Normal   |
| CD34+Progenitors     | 7.42E-02 | 9.33E-01 | 3.16E-01 | 5.46E-01 | Normal   |
| Dendritic cells      | 6.29E-01 | 4.74E-02 | 2.00E-02 | 1        | Normal   |
| CD14+monocytes       | 3.67E-01 | 8.52E-01 | 8.13E-01 | 7.55E-01 | Normal   |
| Mature B cells       | 6.72E-01 | 1.39E-01 | 3.28E-01 | 1        | Normal   |
| Memory CD8+T cells   | 2.54E-01 | 2.78E-02 | 2.85E-01 | 1        | Normal   |

52 Note: For the benchmark analyses, four tools were used to integrate a large-scale meta-GWAS  
 53 summary statistics on severe COVID-19 round 4 (N = 969,689 samples, Supplementary Table S1)  
 54 with scRNA-seq dataset on PBMCs (N = 514,400 cells, Supplementary Table S2) with COVID-19  
 55 of varying clinical severity, including severe, moderate, mild, and healthy controls. The GWAS  
 56 summary dataset were downloaded from COVID-19 Host Genetics Consortium  
 57 (<https://www.covid19hg.org/>; analyzed file named:  
 58 “COVID19\_HGI\_B2\_ALL\_leave\_23andme\_20201020.txt.gz”; released date of October 4 2020).  
 59 There were 7,885 hospitalized COVID-19 patients and 961,804 control participants from 21  
 60 independent contributing studies. To compare the significant levels of these methods in Figure 5A-  
 61 D, we used the log transformation for the P values that were adjusted by using the Bonferroni  
 62 correction method.

63  
 64 **Supplementary Table S5. The effector molecules for calculating molecular**  
 65 **signature scores of naïve CD8+T cells**

| Marker genes | Full name       | Gene Cards Summary                                                                                                                                                                                                                                               |
|--------------|-----------------|------------------------------------------------------------------------------------------------------------------------------------------------------------------------------------------------------------------------------------------------------------------|
| <i>PRDM1</i> | PR/SET Domain 1 | It is a Protein Coding gene. Diseases associated with PRDM1 include B-Cell Lymphoma and Lymphoma. Among its related pathways are Nucleotide-binding oligomerization domain (NOD) pathway and Signaling by Receptor Tyrosine Kinases.                             |
| <i>PRF1</i>  | Perforin 1      | It is a Protein Coding gene. Diseases associated with PRF1 include Hemophagocytic Lymphohistiocytosis, Familial, 2 and Hemophagocytic Lymphohistiocytosis, Familial, 1. Among its related pathways are IL2 signaling events mediated by STAT5 and TNFR1 Pathway. |
| <i>GZMB</i>  | Granzyme B      | It is a Protein Coding gene. Diseases associated with GZMB include Peripheral T-Cell Lymphoma and Aggressive Nk-Cell Leukemia. Among its related pathways are TNFR1 Pathway and Downstream signaling in naïve CD8+ T cells.                                      |
| <i>GNLY</i>  | Granulysin      | It is a Protein Coding gene. Diseases associated with GNLY include Erythema Multiforme and Kyphoscoliotic Heart Disease. Among its related pathways are Innate Immune System and Allograft rejection.                                                            |
| <i>GZMA</i>  | Granzyme A      | It is a Protein Coding gene. Diseases associated with GZMA include Chediak-Higashi Syndrome and Smallpox. Among its related pathways are NF-kappaB Signaling and IL-9 Signaling Pathways.                                                                        |



|              |                  |                                                                                                                                                                                                                                                                    |
|--------------|------------------|--------------------------------------------------------------------------------------------------------------------------------------------------------------------------------------------------------------------------------------------------------------------|
| <i>IFNG</i>  | Interferon Gamma | It is a Protein Coding gene. Diseases associated with IFNG include Immunodeficiency 69 and Hepatitis C Virus. Among its related pathways are Dendritic Cells Developmental Lineage Pathway and Toll Comparative Pathway.                                           |
| <i>FASLG</i> | Fas Ligand       | It is a Protein Coding gene. Diseases associated with FASLG include Autoimmune Lymphoproliferative Syndrome and Lung Cancer. Among its related pathways are TNF Superfamily - Human Ligand-Receptor Interactions and their Associated Functions and TNFR1 Pathway. |

66  
67  
68

**Supplementary Table S6. Benchmarking analyses of scPagwas with LDSC, MAGMA, and RolyPoly for AD-associated brain cell types**

| Cell types      | LDSC-SEG P value | MAGMA P value | RolyPoly P value | scPagwas P value |
|-----------------|------------------|---------------|------------------|------------------|
| OPC             | 0.96             | 0.98          | 0.49             | 4.35E-22         |
| Microglia       | 0.07             | 0.034         | 0.079            | 0.015            |
| Oligodendrocyte | 0.38             | 0.80          | 0.99             | 0.42             |
| Neuron          | 0.79             | 0.13          | 0.39             | 0.76             |
| Astrocyte       | 0.25             | 0.047         | 0.83             | 0.99             |

69  
70  
71

**Supplementary Table S7. Validation of the association of OPC and microglia with AD in three large and independent single-cell datasets using scPagwas**

| Dataset ID | Resources                  | Publication year | OPC P-value | Microglia P value | Cell counts | Reference      |
|------------|----------------------------|------------------|-------------|-------------------|-------------|----------------|
| Dataset #1 | Mouse brain scRNA-seq data | 2018             | 0.01        | 0.12              | 160,796     | PMID: 30096314 |
| Dataset #2 | Human brain snRNA-seq data | 2022             | 0.06        | 0.04              | 101,906     | PMID: 34767070 |
| Dataset #3 | Human brain snRNA-seq data | 2020             | 0.0036      | 4.18E-46          | 14,287      | PMID: 32826893 |

72  
73  
74  
75  
76

Note: Dataset #1 contains 5,435 microglial cells and 820 OPCs, dataset #2 contains 29,130 microglial cells and 1,622 OPCs, and dataset #3 contains 661 microglial cells and 476 OPCs. Since these three datasets were used for independent validation, thus we only chose the nominally significant level as threshold for replicating significant AD-relevant cell types of OPC and microglia.

77  
78

**Supplementary Table S8. GO-term enrichment analysis using cellular component terms of top-ranked 1,000 risk genes for AD**

| Gene Set   | Description         | Enrichment ratio | P value  | FDR      |
|------------|---------------------|------------------|----------|----------|
| GO:0030139 | Endocytic vesicle   | 2.39             | 3.10E-07 | 5.34E-05 |
| GO:0042611 | MHC protein complex | 7.59             | 8.72E-07 | 6.26E-05 |

|            |                                   |      |          |          |
|------------|-----------------------------------|------|----------|----------|
| GO:0030055 | Cell-substrate junction           | 2.07 | 1.09E-06 | 6.26E-05 |
| GO:0099572 | Postsynaptic specialization       | 2.08 | 7.41E-06 | 2.69E-04 |
| GO:0098984 | Neuron to neuron synapse          | 2.08 | 7.95E-06 | 2.69E-04 |
| GO:0031252 | Cell leading edge                 | 1.98 | 9.38E-06 | 2.69E-04 |
| GO:0043235 | Receptor complex                  | 1.97 | 1.14E-05 | 2.80E-04 |
| GO:0098978 | Glutamatergic synapse             | 2.02 | 1.48E-05 | 3.19E-04 |
| GO:0097060 | Synaptic membrane                 | 1.85 | 4.09E-05 | 7.82E-04 |
| GO:0030667 | Secretory granule membrane        | 1.93 | 2.47E-04 | 4.25E-03 |
| GO:0060076 | Excitatory synapse                | 3.62 | 3.38E-04 | 5.28E-03 |
| GO:0098685 | Schaffer collateral - CA1 synapse | 2.81 | 6.31E-04 | 9.04E-03 |
| GO:0005911 | Cell-cell junction                | 1.65 | 1.07E-03 | 1.20E-02 |
| GO:1990351 | Transporter complex               | 1.76 | 1.07E-03 | 1.20E-02 |
| GO:0098793 | Presynapse                        | 1.61 | 1.07E-03 | 1.20E-02 |
| GO:0005581 | Collagen trimer                   | 2.65 | 1.12E-03 | 1.20E-02 |
| GO:0044309 | Neuron spine                      | 2.02 | 2.73E-03 | 2.75E-02 |
| GO:0098552 | Side of membrane                  | 1.55 | 3.06E-03 | 2.75E-02 |
| GO:0005798 | Golgi-associated vesicle          | 1.99 | 3.13E-03 | 2.75E-02 |
| GO:0005667 | Transcription factor complex      | 1.65 | 3.20E-03 | 2.75E-02 |
| GO:0098589 | Membrane region                   | 1.64 | 5.10E-03 | 4.18E-02 |
| GO:0097038 | Perinuclear endoplasmic reticulum | 4.22 | 5.39E-03 | 4.21E-02 |
| GO:0098982 | GABA-ergic synapse                | 2.36 | 9.16E-03 | 6.85E-02 |
| GO:0001772 | Immunological synapse             | 3.13 | 1.10E-02 | 7.85E-02 |
| GO:0030133 | Transport vesicle                 | 1.52 | 1.21E-02 | 8.33E-02 |
| GO:0043198 | Dendritic shaft                   | 3.04 | 1.26E-02 | 8.34E-02 |
| GO:0015629 | Actin cytoskeleton                | 1.43 | 1.43E-02 | 9.13E-02 |
| GO:0005775 | Vacuolar lumen                    | 1.77 | 1.55E-02 | 9.53E-02 |

79  
80  
81  
82

**Supplementary Table S9. Differential gene expression analysis of top-ranked trait-relevant genes in OPC cells among two independent bulk-based gene expression datasets**

| Gene            | GSE15222 (n = 363) |                        |                   | GSE109887 (n =78 ) |                      |                  |
|-----------------|--------------------|------------------------|-------------------|--------------------|----------------------|------------------|
|                 | P value            | Mean Control (n = 187) | Mean AD (n = 176) | P value            | Mean Control (n =46) | Mean AD (n = 46) |
| <i>MCM7</i>     | 1.89E-21           | 8.69                   | 9.44              | 1.20E-08           | 7.59                 | 8.14             |
| <i>CREB1</i>    | 1.48E-18           | 10.09                  | 10.83             | 5.82E-05           | 11.20                | 11.47            |
| <i>GFAP</i>     | 5.92E-16           | 13.51                  | 14.24             | 9.02E-06           | 11.60                | 12.53            |
| <i>TBC1D2B</i>  | 4.54E-17           | 7.21                   | 7.63              | 1.02E-07           | 7.96                 | 8.33             |
| <i>LRRFIP1</i>  | 2.64E-17           | 9.97                   | 10.80             | 3.02E-02           | 10.71                | 10.98            |
| <i>CAPN2</i>    | 2.18E-14           | 10.47                  | 10.81             | NA                 | NA                   | NA               |
| <i>COLGALT1</i> | 5.76E-15           | 6.26                   | 6.70              | NA                 | NA                   | NA               |
| <i>PHKB</i>     | 8.76E-14           | 7.07                   | 7.42              | 1.99E-01           | 7.72                 | 7.66             |
| <i>BHLHE41</i>  | 5.08E-14           | 7.40                   | 7.78              | NA                 | NA                   | NA               |
| <i>SEMA3E</i>   | 8.54E-15           | 10.25                  | 10.86             | 3.99E-02           | 6.60                 | 6.54             |
| <i>AXIN1</i>    | 1.46E-12           | 7.19                   | 7.61              | 6.87E-01           | 6.53                 | 6.52             |

|                 |          |       |       |          |       |       |
|-----------------|----------|-------|-------|----------|-------|-------|
| <i>SLCO4A1</i>  | 2.33E-14 | 7.30  | 8.25  | 1.79E-04 | 7.52  | 7.98  |
| <i>ATOH8</i>    | 1.66E-12 | 8.51  | 9.20  | NA       | NA    | NA    |
| <i>BAX</i>      | 5.89E-07 | 3.38  | 4.06  | 1.74E-01 | 6.99  | 7.03  |
| <i>SYNM</i>     | 4.58E-09 | 9.94  | 10.27 | 6.61E-01 | 6.56  | 6.57  |
| <i>BBX</i>      | 1.02E-10 | 7.33  | 7.92  | 1.39E-06 | 9.10  | 9.49  |
| <i>DYNC1LI2</i> | 7.54E-12 | 8.39  | 8.95  | NA       | NA    | NA    |
| <i>ST5</i>      | 6.33E-12 | 7.36  | 7.74  | 1.43E-02 | 7.03  | 7.11  |
| <i>MYH9</i>     | 2.47E-11 | 9.10  | 9.41  | 1.76E-04 | 10.47 | 10.78 |
| <i>ZMAT3</i>    | 2.34E-11 | 11.65 | 12.08 | 6.67E-01 | 12.05 | 12.08 |
| <i>SLC2A3</i>   | 1.81E-13 | 9.32  | 9.84  | 6.49E-01 | 11.02 | 10.97 |
| <i>KAZN</i>     | 7.99E-12 | 5.68  | 6.26  | NA       | NA    | NA    |
| <i>SYK</i>      | 1.28E-06 | 5.15  | 5.75  | 2.88E-06 | 6.93  | 7.23  |
| <i>HM13</i>     | 1.28E-07 | 2.72  | 3.80  | 1.41E-01 | 6.69  | 6.71  |
| <i>FOXN3</i>    | 2.30E-15 | 9.37  | 9.85  | 5.95E-01 | 6.57  | 6.58  |
| <i>PLEKHM1</i>  | 4.98E-12 | 6.79  | 7.10  | NA       | NA    | NA    |
| <i>RPS3</i>     | 1.63E-08 | 9.63  | 9.99  | 1.12E-04 | 10.59 | 10.87 |
| <i>LYN</i>      | 6.34E-12 | 6.23  | 6.76  | NA       | NA    | NA    |
| <i>PLXDC2</i>   | 2.31E-08 | 6.25  | 6.82  | 2.02E-07 | 8.06  | 8.60  |
| <i>ANGPT2</i>   | 1.33E-12 | 4.53  | 5.65  | 1.92E-05 | 7.05  | 7.59  |
| <i>CTBP2</i>    | 4.71E-11 | 8.31  | 8.73  | 2.45E-03 | 6.83  | 6.90  |
| <i>UPF2</i>     | 2.85E-09 | 6.49  | 7.10  | 9.53E-03 | 9.68  | 9.78  |
| <i>CNOT1</i>    | 3.88E-09 | 6.74  | 7.01  | 2.25E-01 | 8.81  | 8.87  |
| <i>INPP5D</i>   | 4.81E-08 | 5.96  | 6.39  | 3.36E-08 | 7.35  | 7.91  |
| <i>CD151</i>    | 2.49E-08 | 7.87  | 8.24  | 3.08E-07 | 9.32  | 9.94  |
| <i>NCOA3</i>    | 3.62E-08 | 6.71  | 6.97  | 5.38E-02 | 6.60  | 6.63  |
| <i>GSK3B</i>    | 5.30E-07 | 6.13  | 6.45  | 4.30E-02 | 8.18  | 8.29  |
| <i>ETV6</i>     | 4.56E-06 | 6.11  | 6.58  | 1.37E-04 | 8.04  | 8.33  |
| <i>DBF4</i>     | 3.19E-12 | 11.45 | 12.15 | 4.34E-01 | 6.64  | 6.63  |
| <i>LRFN4</i>    | 1.44E-09 | 7.77  | 8.14  | 2.05E-01 | 7.67  | 7.74  |
| <i>CXCR4</i>    | 1.29E-10 | 6.16  | 6.87  | 2.01E-03 | 6.60  | 6.69  |
| <i>COASY</i>    | 6.76E-08 | 9.41  | 9.58  | 3.65E-04 | 9.16  | 9.43  |
| <i>MAP3K1</i>   | 1.85E-09 | 7.43  | 7.88  | NA       | NA    | NA    |
| <i>ITGA8</i>    | 5.22E-07 | 4.70  | 5.34  | 1.81E-04 | 6.95  | 7.24  |
| <i>CREBBP</i>   | 1.56E-08 | 7.57  | 7.80  | 8.22E-04 | 8.40  | 8.56  |
| <i>GLRX3</i>    | 2.21E-08 | 2.68  | 3.70  | 2.82E-02 | 7.97  | 7.72  |
| <i>ZFH3</i>     | 6.67E-05 | 6.48  | 6.81  | NA       | NA    | NA    |
| <i>TPD52L2</i>  | 3.42E-09 | 9.16  | 9.42  | 5.44E-03 | 9.88  | 10.10 |
| <i>TNS3</i>     | 4.35E-09 | 9.83  | 10.26 | 3.88E-06 | 10.88 | 11.50 |
| <i>CEBPD</i>    | 3.87E-08 | 9.10  | 9.62  | 2.34E-05 | 10.30 | 10.93 |
| <i>POU2F2</i>   | 4.14E-10 | 5.51  | 6.03  | 9.41E-01 | 6.44  | 6.45  |
| <i>UNC13D</i>   | 4.08E-08 | 4.59  | 5.21  | 3.92E-01 | 6.57  | 6.59  |
| <i>LHFPL2</i>   | 1.03E-07 | 7.21  | 7.55  | NA       | NA    | NA    |
| <i>RBM42</i>    | 5.10E-08 | 8.89  | 9.03  | 8.36E-02 | 8.68  | 8.52  |
| <i>ATP11C</i>   | 3.79E-08 | 4.95  | 5.39  | 8.33E-07 | 6.91  | 7.08  |
| <i>ARPC1B</i>   | 1.17E-07 | 6.78  | 7.26  | 3.19E-01 | 6.72  | 6.73  |
| <i>RXRA</i>     | 9.25E-07 | 10.03 | 10.33 | 3.91E-06 | 10.21 | 10.77 |

|                 |          |       |       |          |       |       |
|-----------------|----------|-------|-------|----------|-------|-------|
| <i>HLA-DPB1</i> | 3.41E-09 | 10.11 | 10.51 | 7.23E-01 | 6.88  | 6.90  |
| <i>ID3</i>      | 8.55E-05 | 7.36  | 7.87  | 3.92E-04 | 8.05  | 8.60  |
| <i>AK2</i>      | 1.05E-07 | 8.26  | 8.49  | 3.84E-04 | 8.08  | 8.28  |
| <i>LAPTM5</i>   | 2.05E-07 | 6.38  | 6.78  | 8.10E-06 | 7.29  | 7.79  |
| <i>ZRANB1</i>   | 7.20E-08 | 7.52  | 8.14  | 2.78E-02 | 8.80  | 9.09  |
| <i>GRN</i>      | 3.63E-07 | 7.10  | 7.32  | 1.34E-02 | 7.14  | 7.25  |
| <i>KLF6</i>     | 4.93E-07 | 5.37  | 5.80  | 1.70E-06 | 8.30  | 8.70  |
| <i>EBF4</i>     | 3.45E-03 | 6.34  | 6.58  | 7.43E-02 | 6.77  | 6.83  |
| <i>ZFP36L1</i>  | 7.31E-06 | 11.11 | 11.44 | 3.01E-06 | 9.61  | 10.32 |
| <i>TSHZ1</i>    | 4.21E-08 | 7.33  | 7.65  | 7.92E-01 | 8.48  | 8.46  |
| <i>RHBDF2</i>   | 3.60E-07 | 5.53  | 5.98  | 3.54E-06 | 7.64  | 8.14  |
| <i>CSF2RA</i>   | 1.96E-05 | 4.84  | 5.16  | 1.13E-06 | 10.46 | 11.05 |
| <i>PLCG1</i>    | 2.94E-10 | 10.16 | 10.54 | 9.19E-08 | 8.42  | 8.79  |
| <i>BTG1</i>     | 2.96E-11 | 9.11  | 9.63  | 1.74E-05 | 10.19 | 10.49 |
| <i>PABPC1</i>   | 6.71E-06 | 9.54  | 9.85  | 4.85E-05 | 9.87  | 10.13 |
| <i>ETV1</i>     | 2.38E-04 | 3.95  | 4.34  | 4.91E-03 | 6.71  | 6.61  |
| <i>RHBDD3</i>   | 1.27E-07 | 6.51  | 6.81  | NA       | NA    | NA    |
| <i>PELI2</i>    | 1.59E-07 | 5.56  | 5.97  | 7.40E-04 | 7.81  | 8.03  |
| <i>SUGT1</i>    | 7.78E-08 | 8.43  | 8.77  | 2.13E-01 | 8.29  | 8.38  |
| <i>ZIC2</i>     | 6.21E-10 | 8.67  | 9.42  | 3.17E-03 | 9.33  | 9.73  |
| <i>BEST3</i>    | 2.67E-08 | 4.68  | 5.28  | NA       | NA    | NA    |
| <i>TRAFD1</i>   | 7.76E-07 | 7.25  | 7.48  | 1.14E-02 | 7.32  | 7.41  |
| <i>LAT2</i>     | 1.80E-09 | 5.86  | 6.46  | NA       | NA    | NA    |
| <i>RASAL2</i>   | 4.17E-04 | 4.53  | 4.78  | 1.78E-04 | 6.76  | 6.67  |
| <i>44810</i>    | 2.19E-04 | 4.77  | 5.21  | NA       | NA    | NA    |
| <i>NCOA5</i>    | 8.02E-05 | 4.46  | 4.80  | NA       | NA    | NA    |
| <i>TRIO</i>     | 8.55E-04 | 5.11  | 5.62  | 4.89E-02 | 7.92  | 7.83  |
| <i>RPS6KB2</i>  | 1.64E-06 | 6.96  | 7.24  | 9.59E-04 | 8.41  | 8.79  |
| <i>SCN1A</i>    | 1.73E-05 | 6.95  | 7.42  | 6.09E-01 | 9.11  | 9.18  |
| <i>IKZF1</i>    | 1.92E-03 | 3.24  | 3.74  | 3.53E-03 | 6.72  | 6.90  |
| <i>JDP2</i>     | 2.03E-09 | 7.19  | 7.53  | 2.58E-04 | 7.41  | 7.71  |
| <i>FRMD6</i>    | 1.16E-05 | 5.81  | 6.24  | 4.44E-02 | 7.21  | 7.32  |
| <i>CHD1</i>     | 6.64E-06 | 5.64  | 5.98  | NA       | NA    | NA    |
| <i>ASCL1</i>    | 1.06E-04 | 4.64  | 5.08  | 1.79E-05 | 9.24  | 9.82  |
| <i>CDC25B</i>   | 3.81E-08 | 7.92  | 8.26  | 8.51E-03 | 8.13  | 8.28  |
| <i>GPRIN3</i>   | 9.07E-07 | 5.79  | 6.16  | 5.92E-02 | 6.55  | 6.58  |
| <i>ANKRD44</i>  | 2.01E-08 | 12.36 | 12.84 | 6.82E-03 | 6.49  | 6.53  |
| <i>RAPGEF1</i>  | 4.85E-06 | 8.77  | 8.97  | 6.96E-04 | 8.13  | 8.44  |
| <i>CD81</i>     | 1.69E-05 | 12.43 | 12.64 | 7.25E-02 | 12.99 | 13.08 |
| <i>EBF1</i>     | 7.41E-05 | 3.21  | 4.09  | 1.03E-01 | 7.24  | 7.37  |
| <i>PRPSAP1</i>  | 7.61E-06 | 8.98  | 9.09  | 3.77E-01 | 9.94  | 9.99  |
| <i>CEBPG</i>    | 3.48E-07 | 7.83  | 8.07  | NA       | NA    | NA    |
| <i>CYBA</i>     | 2.21E-05 | 6.89  | 7.30  | 3.67E-01 | 7.19  | 7.29  |
| <i>GPC6</i>     | 1.04E-05 | 2.44  | 3.37  | 4.27E-01 | 7.64  | 7.71  |
| <i>ANO6</i>     | 3.45E-04 | 6.20  | 6.48  | NA       | NA    | NA    |
| <i>ZNHIT6</i>   | 1.35E-05 | 8.39  | 8.57  | 1.34E-05 | 8.92  | 9.17  |

|                 |          |       |       |          |       |       |
|-----------------|----------|-------|-------|----------|-------|-------|
| <i>CD44</i>     | 3.47E-10 | 6.12  | 6.61  | 1.94E-03 | 8.10  | 8.68  |
| <i>THAP4</i>    | 4.09E-06 | 9.92  | 10.04 | 2.68E-01 | 6.49  | 6.47  |
| <i>ARHGAP17</i> | 1.26E-05 | 7.29  | 7.48  | 1.65E-05 | 8.02  | 8.33  |
| <i>MYH14</i>    | 8.01E-06 | 7.13  | 7.37  | 6.18E-01 | 6.83  | 6.81  |
| <i>RHOC</i>     | 1.13E-04 | 9.53  | 9.82  | 9.30E-06 | 9.55  | 10.08 |
| <i>SLC25A39</i> | 1.41E-05 | 9.47  | 9.65  | 1.05E-05 | 10.00 | 10.40 |
| <i>GLB1</i>     | 1.98E-05 | 7.18  | 7.33  | 6.10E-02 | 7.86  | 7.95  |
| <i>SLC7A6OS</i> | 8.49E-03 | 3.77  | 4.13  | 2.77E-01 | 6.88  | 6.92  |
| <i>RGS17</i>    | 4.07E-05 | 8.79  | 9.04  | 6.20E-01 | 9.29  | 9.33  |
| <i>PAG1</i>     | 1.87E-06 | 7.54  | 7.92  | 7.97E-03 | 8.01  | 8.15  |
| <i>CMTM7</i>    | 7.34E-06 | 5.81  | 6.21  | 1.40E-01 | 6.87  | 6.95  |
| <i>CLK1</i>     | 2.23E-05 | 8.92  | 9.15  | 4.96E-02 | 9.43  | 9.64  |
| <i>VCAN</i>     | 1.10E-05 | 8.14  | 8.48  | 6.97E-09 | 8.87  | 9.66  |
| <i>IL6ST</i>    | 8.62E-08 | 1.65  | 2.92  | 7.97E-01 | 6.90  | 6.91  |
| <i>C6orf89</i>  | 6.93E-03 | 3.72  | 4.11  | 6.60E-03 | 6.91  | 6.84  |
| <i>IL13RA1</i>  | 7.76E-03 | 7.38  | 7.59  | NA       | NA    | NA    |
| <i>FYB</i>      | 1.70E-04 | 3.91  | 4.29  | 3.87E-02 | 7.31  | 7.57  |
| <i>ZNF431</i>   | 5.30E-06 | 3.06  | 3.70  | 1.59E-02 | 6.74  | 6.81  |
| <i>SCIN</i>     | 2.24E-07 | 13.13 | 13.58 | 1.15E-04 | 6.91  | 7.35  |
| <i>MECP2</i>    | 4.03E-05 | 6.90  | 7.10  | 4.24E-04 | 7.20  | 6.93  |
| <i>PRKCH</i>    | 1.82E-04 | 5.35  | 5.68  | 4.70E-05 | 7.76  | 8.09  |
| <i>RUNX1</i>    | 3.72E-08 | 3.96  | 4.78  | 1.96E-06 | 6.55  | 6.66  |
| <i>GTF3C1</i>   | 2.39E-05 | 7.52  | 7.69  | 2.35E-01 | 8.05  | 7.96  |
| <i>CHIC2</i>    | 3.58E-05 | 6.98  | 7.15  | 4.08E-01 | 8.90  | 8.96  |
| <i>STAB1</i>    | 4.21E-07 | 7.00  | 7.47  | 3.48E-03 | 6.89  | 7.15  |
| <i>CARD11</i>   | 2.51E-06 | 3.84  | 4.25  | 5.81E-04 | 6.94  | 7.16  |
| <i>ACSL1</i>    | 1.42E-05 | 6.57  | 6.89  | 1.19E-04 | 8.58  | 9.00  |
| <i>MYOF</i>     | 7.69E-04 | 5.43  | 5.69  | 1.74E-03 | 7.17  | 7.50  |
| <i>SH3TC1</i>   | 1.04E-04 | 4.67  | 5.07  | 1.46E-04 | 6.94  | 7.23  |
| <i>PALD1</i>    | 2.86E-04 | 7.12  | 7.36  | NA       | NA    | NA    |
| <i>JUND</i>     | 3.56E-05 | 13.08 | 13.26 | 4.36E-01 | 13.43 | 13.39 |
| <i>DUSP1</i>    | 1.94E-07 | 8.14  | 8.60  | 1.97E-02 | 9.81  | 10.32 |
| <i>SLC6A13</i>  | 6.15E-06 | 5.85  | 6.35  | 4.24E-02 | 6.53  | 6.57  |
| <i>PLOD3</i>    | 1.20E-05 | 6.57  | 6.90  | NA       | NA    | NA    |
| <i>SF3A3</i>    | 3.65E-05 | 8.28  | 8.37  | 2.97E-02 | 9.78  | 9.95  |
| <i>CCND1</i>    | 9.61E-04 | 7.19  | 7.46  | 2.70E-04 | 9.26  | 9.80  |
| <i>PRPF38B</i>  | 7.89E-06 | 3.12  | 3.86  | 5.49E-02 | 7.12  | 7.24  |
| <i>MED13L</i>   | 3.13E-04 | 6.32  | 6.58  | 1.08E-03 | 7.52  | 7.71  |
| <i>HCLS1</i>    | 2.32E-03 | 6.99  | 7.28  | 3.41E-02 | 7.99  | 8.31  |
| <i>SEC24C</i>   | 2.35E-05 | 9.12  | 9.31  | 1.31E-02 | 8.92  | 9.07  |
| <i>PEAK1</i>    | 1.50E-04 | 9.43  | 9.57  | NA       | NA    | NA    |
| <i>XRN2</i>     | 3.00E-03 | 6.73  | 6.87  | 4.65E-01 | 7.08  | 7.11  |
| <i>IL18</i>     | 1.11E-07 | 11.68 | 12.29 | 1.17E-05 | 13.41 | 13.61 |
| <i>SOCS5</i>    | 7.13E-04 | 7.11  | 7.32  | 4.34E-02 | 7.04  | 6.96  |
| <i>BRAF</i>     | 1.42E-03 | 4.68  | 4.89  | 4.73E-01 | 6.80  | 6.84  |
| <i>CREB3</i>    | 6.21E-04 | 8.78  | 8.94  | NA       | NA    | NA    |

|                 |          |      |      |          |       |       |
|-----------------|----------|------|------|----------|-------|-------|
| <i>SPAG1</i>    | 1.46E-07 | 1.86 | 2.82 | 1.32E-03 | 6.65  | 6.72  |
| <i>CD86</i>     | 3.67E-03 | 4.16 | 4.49 | 6.99E-04 | 6.99  | 7.17  |
| <i>TBC1D1</i>   | 5.58E-05 | 7.68 | 7.89 | NA       | NA    | NA    |
| <i>TXNIP</i>    | 3.29E-04 | 9.20 | 9.60 | 1.59E-03 | 11.06 | 11.66 |
| <i>TAL1</i>     | 1.10E-03 | 5.04 | 5.31 | 2.85E-06 | 6.61  | 6.74  |
| <i>ATF4</i>     | 8.83E-05 | 6.94 | 7.20 | 3.64E-05 | 10.16 | 10.66 |
| <i>CSF1R</i>    | 4.84E-03 | 9.22 | 9.45 | 3.72E-06 | 9.71  | 10.38 |
| <i>DVL1</i>     | 1.23E-02 | 4.12 | 4.34 | 5.84E-02 | 6.57  | 6.55  |
| <i>CHN2</i>     | 2.48E-03 | 5.88 | 6.30 | 3.37E-01 | 8.43  | 8.53  |
| <i>RBM47</i>    | 1.94E-04 | 3.17 | 3.77 | 1.89E-03 | 6.90  | 7.21  |
| <i>GGA2</i>     | 3.62E-04 | 4.76 | 4.98 | 5.37E-06 | 8.40  | 8.77  |
| <i>FBXW7</i>    | 3.41E-04 | 6.04 | 6.44 | 3.60E-06 | 9.77  | 9.37  |
| <i>TANC1</i>    | 5.69E-03 | 5.16 | 5.40 | 8.22E-02 | 7.87  | 8.00  |
| <i>RPIA</i>     | 9.54E-04 | 6.09 | 6.26 | 1.76E-01 | 7.90  | 7.97  |
| <i>SLCO2B1</i>  | 4.82E-03 | 8.50 | 8.70 | 5.82E-05 | 8.92  | 9.44  |
| <i>SOAT1</i>    | 1.90E-04 | 4.50 | 4.79 | 3.72E-02 | 6.77  | 6.83  |
| <i>RAB3IP</i>   | 5.96E-06 | 7.81 | 8.21 | 1.87E-01 | 8.37  | 8.46  |
| <i>PARP14</i>   | 7.00E-05 | 6.38 | 6.65 | 1.24E-04 | 7.34  | 7.63  |
| <i>IRAK3</i>    | 1.66E-04 | 4.34 | 4.76 | 2.65E-03 | 6.95  | 7.12  |
| <i>ADAM15</i>   | 2.77E-04 | 6.90 | 7.11 | 1.52E-01 | 7.10  | 7.17  |
| <i>MSR1</i>     | 5.84E-05 | 1.67 | 2.42 | 1.58E-03 | 6.59  | 6.65  |
| <i>ALOX5</i>    | 2.89E-05 | 6.88 | 7.30 | 7.98E-01 | 6.51  | 6.51  |
| <i>NAA16</i>    | 5.40E-04 | 2.46 | 3.13 | NA       | NA    | NA    |
| <i>KCNMB1</i>   | 1.04E-02 | 4.79 | 5.02 | 8.45E-01 | 6.99  | 7.01  |
| <i>KLHL5</i>    | 2.37E-03 | 8.50 | 8.68 | 2.16E-03 | 9.12  | 9.40  |
| <i>CPVL</i>     | 2.39E-04 | 5.12 | 5.57 | 1.10E-01 | 7.59  | 7.88  |
| <i>STK32A</i>   | 1.66E-03 | 3.15 | 3.53 | 1.95E-01 | 6.46  | 6.48  |
| <i>CACNA1A</i>  | 1.51E-04 | 6.64 | 7.03 | 9.38E-03 | 7.21  | 7.02  |
| <i>PTGFR</i>    | 1.18E-03 | 2.05 | 2.63 | 1.41E-02 | 6.63  | 6.67  |
| <i>PTEN</i>     | 2.56E-02 | 5.97 | 6.11 | NA       | NA    | NA    |
| <i>SRGAP2</i>   | 2.49E-05 | 7.99 | 8.38 | 8.12E-01 | 6.85  | 6.85  |
| <i>SUSD6</i>    | 7.66E-03 | 5.58 | 5.82 | NA       | NA    | NA    |
| <i>IL16</i>     | 1.43E-06 | 4.14 | 4.92 | 4.29E-01 | 6.55  | 6.56  |
| <i>ID1</i>      | 2.97E-02 | 6.37 | 6.62 | 1.60E-03 | 7.62  | 7.97  |
| <i>NCKAP1L</i>  | 1.89E-04 | 5.00 | 5.40 | 1.71E-04 | 7.19  | 7.55  |
| <i>MS4A6A</i>   | 2.49E-05 | 5.86 | 6.26 | 8.35E-03 | 7.60  | 8.03  |
| <i>AKIP1</i>    | 6.30E-04 | 5.89 | 6.12 | NA       | NA    | NA    |
| <i>ARHGAP22</i> | 9.38E-04 | 6.97 | 7.17 | 7.93E-05 | 8.00  | 8.34  |
| <i>MTSS1</i>    | 8.00E-03 | 5.93 | 6.11 | 3.66E-02 | 9.47  | 9.57  |
| <i>TIAM1</i>    | 3.47E-03 | 2.53 | 3.02 | 8.95E-01 | 7.49  | 7.48  |
| <i>TRPC3</i>    | 3.07E-02 | 4.61 | 4.78 | 8.05E-01 | 6.83  | 6.84  |
| <i>CRKL</i>     | 3.58E-04 | 9.28 | 9.39 | 9.64E-03 | 10.84 | 10.98 |
| <i>RBMS1</i>    | 4.36E-03 | 6.38 | 6.54 | 6.76E-02 | 6.86  | 6.92  |
| <i>PILRA</i>    | 6.31E-03 | 3.48 | 3.78 | 6.70E-02 | 6.91  | 6.96  |
| <i>ADAM28</i>   | 1.71E-02 | 3.78 | 4.02 | 1.00E-03 | 6.53  | 6.58  |
| <i>OLIG1</i>    | 7.10E-03 | 9.71 | 9.94 | 4.45E-05 | 9.56  | 10.13 |

|                 |          |       |       |          |       |       |
|-----------------|----------|-------|-------|----------|-------|-------|
| <i>ASIC4</i>    | 5.76E-04 | 5.98  | 6.21  | NA       | NA    | NA    |
| <i>SLU7</i>     | 4.02E-04 | 7.21  | 7.35  | 9.16E-01 | 7.90  | 7.89  |
| <i>LRBA</i>     | 9.32E-04 | 6.39  | 6.53  | 6.75E-02 | 7.46  | 7.52  |
| <i>C3</i>       | 1.10E-03 | 8.88  | 9.22  | 7.99E-01 | 6.73  | 6.71  |
| <i>EML4</i>     | 2.45E-03 | 6.86  | 6.96  | 6.41E-03 | 8.05  | 8.17  |
| <i>GOLGA8A</i>  | 4.79E-07 | 10.03 | 9.58  | 7.18E-01 | 8.73  | 8.77  |
| <i>BLNK</i>     | 9.84E-03 | 2.38  | 2.87  | 2.53E-01 | 6.49  | 6.50  |
| <i>HGS</i>      | 4.06E-04 | 10.07 | 10.18 | 2.30E-01 | 10.86 | 10.94 |
| <i>HSPA1A</i>   | 5.72E-06 | 8.83  | 9.42  | 7.97E-04 | 10.48 | 11.24 |
| <i>ABHD12</i>   | 3.52E-03 | 7.06  | 7.22  | 9.96E-02 | 7.87  | 7.78  |
| <i>AKAP13</i>   | 1.82E-02 | 3.79  | 4.08  | 1.13E-04 | 7.98  | 8.12  |
| <i>RASSF2</i>   | 2.44E-02 | 2.06  | 2.50  | 1.71E-04 | 8.94  | 9.39  |
| <i>TSPAN9</i>   | 5.57E-06 | 8.33  | 8.83  | 3.05E-02 | 9.78  | 9.97  |
| <i>SLC25A37</i> | 1.91E-03 | 7.53  | 7.75  | 1.68E-02 | 7.79  | 7.98  |
| <i>PPARD</i>    | 3.99E-02 | 3.20  | 3.47  | 2.95E-01 | 7.01  | 7.04  |
| <i>AFAP1L2</i>  | 1.33E-02 | 7.98  | 8.12  | 2.35E-01 | 8.68  | 8.78  |
| <i>GSDMB</i>    | 2.04E-04 | 7.54  | 7.78  | 7.76E-05 | 8.32  | 8.74  |
| <i>CRTAM</i>    | 3.05E-03 | 2.62  | 5.18  | 8.02E-01 | 6.49  | 6.49  |
| <i>COL9A1</i>   | 2.99E-03 | 7.51  | 7.75  | 3.06E-03 | 7.03  | 7.24  |
| <i>SMOC1</i>    | 4.46E-03 | 7.68  | 7.91  | 1.12E-02 | 7.25  | 7.48  |
| <i>VSIG4</i>    | 3.53E-03 | 5.52  | 5.94  | 3.36E-02 | 7.12  | 7.34  |
| <i>ARL5A</i>    | 2.73E-02 | 4.64  | 4.82  | 6.32E-02 | 10.12 | 10.24 |
| <i>PLCB4</i>    | 4.89E-02 | 7.38  | 7.59  | 2.65E-01 | 6.79  | 6.82  |
| <i>RAB9B</i>    | 2.48E-02 | 6.54  | 6.81  | 3.65E-03 | 8.46  | 8.20  |
| <i>PIK3R5</i>   | 6.95E-03 | 3.03  | 3.42  | 7.80E-02 | 6.54  | 6.57  |
| <i>FAM110B</i>  | 5.41E-03 | 7.80  | 7.95  | 4.41E-01 | 8.36  | 8.41  |
| <i>C1QA</i>     | 1.64E-03 | 8.40  | 8.74  | 1.62E-01 | 6.93  | 7.01  |
| <i>HSPA1B</i>   | 1.10E-03 | 10.12 | 10.47 | 3.23E-01 | 11.31 | 11.54 |
| <i>HLA-DMB</i>  | 1.20E-02 | 8.53  | 8.77  | 1.18E-06 | 8.67  | 9.37  |
| <i>CALCRL</i>   | 3.58E-04 | 3.57  | 3.99  | 2.53E-02 | 6.92  | 7.05  |
| <i>HLA-DPA1</i> | 4.93E-03 | 9.16  | 9.41  | 2.94E-01 | 8.32  | 8.53  |
| <i>CD74</i>     | 1.11E-02 | 9.41  | 9.65  | 6.90E-01 | 8.75  | 8.84  |
| <i>TYROBP</i>   | 1.31E-02 | 7.23  | 7.49  | 5.54E-02 | 8.03  | 8.35  |
| <i>SLC22A3</i>  | 1.01E-02 | 3.35  | 3.67  | 5.87E-02 | 6.61  | 6.66  |
| <i>CTNNB1</i>   | 8.58E-03 | 4.81  | 5.02  | 1.03E-01 | 6.86  | 6.81  |
| <i>CDKN1A</i>   | 4.61E-04 | 8.78  | 9.18  | 3.29E-04 | 8.63  | 9.21  |
| <i>PTPRE</i>    | 1.98E-02 | 1.58  | 2.21  | 1.31E-02 | 8.32  | 8.16  |
| <i>CLCN6</i>    | 1.30E-02 | 3.49  | 3.74  | 3.16E-01 | 8.85  | 8.81  |
| <i>DOCK2</i>    | 1.68E-02 | 5.52  | 5.73  | 1.53E-03 | 7.62  | 7.93  |
| <i>MFSD5</i>    | 4.37E-03 | 6.74  | 6.85  | 7.37E-03 | 7.52  | 7.61  |
| <i>RSAD2</i>    | 9.51E-10 | 8.43  | 9.11  | 6.61E-03 | 7.01  | 6.84  |
| <i>HIRA</i>     | 4.88E-03 | 4.18  | 4.51  | 8.02E-01 | 7.10  | 7.09  |
| <i>TNK2</i>     | 5.50E-03 | 10.73 | 10.85 | 2.74E-03 | 9.73  | 9.98  |
| <i>SH3GL1</i>   | 6.60E-03 | 5.73  | 5.86  | 1.55E-02 | 8.19  | 8.41  |
| <i>C1QB</i>     | 4.85E-03 | 9.92  | 10.24 | NA       | NA    | NA    |
| <i>GNB4</i>     | 1.11E-11 | 6.49  | 7.35  | 2.52E-04 | 7.01  | 7.18  |

|                 |          |       |       |          |       |       |
|-----------------|----------|-------|-------|----------|-------|-------|
| <i>GRIA4</i>    | 1.39E-03 | 4.63  | 5.02  | 5.74E-02 | 7.53  | 7.37  |
| <i>KCTD16</i>   | 3.84E-02 | 3.89  | 4.16  | 5.67E-04 | 7.44  | 7.15  |
| <i>NELFB</i>    | 2.09E-03 | 8.51  | 8.64  | NA       | NA    | NA    |
| <i>SLC7A5</i>   | 8.13E-04 | 7.41  | 7.66  | 7.15E-04 | 9.38  | 9.85  |
| <i>PDZD2</i>    | 5.82E-03 | 1.85  | 2.42  | 3.65E-01 | 9.63  | 9.53  |
| <i>FERMT1</i>   | 9.28E-03 | 7.07  | 7.30  | 5.14E-01 | 6.81  | 6.84  |
| <i>IGFBP5</i>   | 7.60E-04 | 2.20  | 2.93  | 4.88E-05 | 9.70  | 10.14 |
| <i>RALGPS2</i>  | 1.48E-04 | 2.23  | 3.04  | 3.50E-01 | 6.76  | 6.80  |
| <i>HNMT</i>     | 4.12E-02 | 6.01  | 6.15  | 4.49E-02 | 7.55  | 7.63  |
| <i>OPCML</i>    | 1.10E-02 | 7.82  | 7.98  | 6.44E-05 | 9.78  | 9.26  |
| <i>UNC80</i>    | 3.25E-02 | 3.05  | 3.35  | NA       | NA    | NA    |
| <i>ITGAL</i>    | 2.52E-02 | 3.53  | 3.79  | 6.62E-03 | 6.64  | 6.75  |
| <i>CCDC26</i>   | 2.19E-04 | 2.87  | 3.42  | 9.28E-01 | 6.56  | 6.56  |
| <i>COL7A1</i>   | 9.11E-03 | 7.40  | 7.61  | 9.83E-02 | 8.08  | 8.22  |
| <i>MYO18A</i>   | 1.49E-04 | 1.66  | 2.39  | 1.80E-01 | 6.74  | 6.84  |
| <i>KYNU</i>     | 1.22E-02 | 3.42  | 3.71  | 1.94E-01 | 6.72  | 6.77  |
| <i>EXOSC10</i>  | 9.68E-03 | 9.18  | 9.28  | 2.97E-03 | 8.76  | 8.91  |
| <i>C4orf19</i>  | 6.66E-03 | 4.52  | 4.82  | 2.02E-03 | 6.85  | 6.98  |
| <i>RAP1A</i>    | 1.55E-03 | 6.88  | 7.08  | 2.29E-02 | 6.86  | 6.94  |
| <i>MFSD14A</i>  | 4.34E-02 | 6.99  | 7.11  | NA       | NA    | NA    |
| <i>FAM129A</i>  | 9.36E-04 | 2.47  | 2.98  | 3.36E-02 | 7.37  | 7.54  |
| <i>MAF</i>      | 1.00E-02 | 5.67  | 5.82  | 2.38E-03 | 7.20  | 7.33  |
| <i>HS6ST3</i>   | 2.73E-02 | 2.50  | 2.87  | 3.41E-01 | 6.48  | 6.47  |
| <i>VCL</i>      | 3.74E-02 | 6.17  | 6.29  | 7.53E-06 | 8.82  | 9.13  |
| <i>SCN2A</i>    | 8.56E-03 | 11.53 | 11.70 | 2.22E-02 | 6.46  | 6.43  |
| <i>WBP1L</i>    | 2.77E-02 | 3.14  | 3.49  | NA       | NA    | NA    |
| <i>RPS3A</i>    | 7.76E-03 | 12.56 | 12.69 | 8.00E-02 | 12.05 | 12.15 |
| <i>C1QC</i>     | 6.95E-03 | 6.70  | 7.04  | 4.53E-01 | 8.48  | 8.63  |
| <i>C10orf10</i> | 4.61E-06 | 7.74  | 8.28  | 8.61E-04 | 8.44  | 9.14  |
| <i>CTSS</i>     | 1.99E-02 | 5.47  | 5.69  | 7.89E-02 | 6.60  | 6.65  |
| <i>RPL13</i>    | 1.49E-02 | 10.45 | 10.58 | 2.26E-03 | 8.70  | 8.92  |
| <i>THOC1</i>    | 3.08E-02 | 8.74  | 8.81  | 2.51E-02 | 8.83  | 8.95  |
| <i>IER2</i>     | 5.68E-03 | 6.20  | 6.36  | 1.66E-04 | 6.89  | 7.00  |
| <i>NTNG1</i>    | 1.07E-08 | 7.31  | 6.86  | 1.29E-04 | 8.32  | 7.87  |
| <i>JUNB</i>     | 7.64E-03 | 2.54  | 2.97  | 4.98E-01 | 6.79  | 6.76  |
| <i>ARPP21</i>   | 2.93E-17 | 8.16  | 7.22  | NA       | NA    | NA    |
| <i>ZNF385D</i>  | 2.18E-02 | 6.42  | 6.64  | 7.51E-02 | 8.42  | 8.26  |
| <i>HLA-DQA1</i> | 1.88E-02 | 4.82  | 5.31  | NA       | NA    | NA    |
| <i>SP100</i>    | 1.88E-02 | 11.04 | 11.10 | 3.03E-04 | 6.71  | 6.83  |
| <i>PTPRC</i>    | 2.90E-04 | 1.64  | 2.42  | 2.74E-04 | 6.49  | 6.51  |
| <i>TLR2</i>     | 3.77E-02 | 5.71  | 6.00  | 1.25E-02 | 6.47  | 6.52  |
| <i>PKIB</i>     | 2.11E-01 | 0.70  | 1.15  | 1.32E-01 | 6.77  | 6.71  |
| <i>FCGR1A</i>   | 2.48E-02 | 2.55  | 3.07  | 6.01E-02 | 7.12  | 7.32  |
| <i>PSMA1</i>    | 1.99E-09 | 8.68  | 8.38  | 7.49E-04 | 8.53  | 8.26  |
| <i>PELI1</i>    | 4.44E-02 | 6.35  | 6.46  | 8.50E-01 | 8.00  | 8.02  |
| <i>CEMIP</i>    | 1.82E-02 | 7.06  | 7.33  | NA       | NA    | NA    |



|               |          |       |       |          |       |       |
|---------------|----------|-------|-------|----------|-------|-------|
| <i>MRPL27</i> | 8.38E-03 | 8.85  | 8.96  | 1.99E-01 | 7.73  | 7.78  |
| <i>LIMD1</i>  | 3.39E-02 | 2.65  | 2.98  | 5.94E-01 | 6.48  | 6.48  |
| <i>GDAP2</i>  | 3.43E-02 | 2.30  | 2.67  | 3.08E-04 | 6.68  | 6.77  |
| <i>ACER2</i>  | 3.01E-02 | 3.69  | 3.95  | 8.95E-01 | 6.69  | 6.69  |
| <i>CUL9</i>   | 1.67E-02 | 8.08  | 8.19  | 6.53E-01 | 8.16  | 8.19  |
| <i>NEU4</i>   | 3.02E-02 | 6.44  | 6.60  | 8.01E-02 | 8.02  | 8.27  |
| <i>SLC7A1</i> | 1.79E-02 | 3.36  | 3.66  | 1.99E-01 | 9.85  | 9.96  |
| <i>HLA-B</i>  | 2.97E-02 | 8.75  | 8.92  | 1.79E-01 | 8.92  | 9.12  |
| <i>MAP3K8</i> | 3.88E-02 | 4.69  | 4.93  | 4.46E-03 | 7.14  | 7.38  |
| <i>UBE3D</i>  | 4.44E-02 | 4.95  | 5.05  | NA       | NA    | NA    |
| <i>ZNF445</i> | 4.84E-03 | 2.98  | 3.37  | 8.65E-03 | 6.48  | 6.54  |
| <i>ZFPM2</i>  | 6.13E-03 | 3.46  | 4.12  | 2.27E-03 | 7.33  | 7.10  |
| <i>ITPKC</i>  | 9.04E-03 | 2.20  | 2.73  | 1.12E-03 | 6.74  | 6.84  |
| <i>RXRB</i>   | 1.81E-02 | 7.71  | 7.78  | 6.55E-02 | 10.03 | 10.15 |
| <i>SORL1</i>  | 4.24E-02 | 8.70  | 8.78  | 1.98E-02 | 9.55  | 9.38  |
| <i>NFYC</i>   | 2.87E-02 | 9.03  | 9.11  | 1.04E-01 | 8.40  | 8.30  |
| <i>CAMKK2</i> | 4.80E-02 | 8.50  | 8.72  | 4.91E-03 | 9.15  | 8.77  |
| <i>ZFP36</i>  | 1.56E-02 | 8.55  | 8.84  | 2.56E-03 | 8.26  | 8.81  |
| <i>CCL2</i>   | 1.37E-02 | 4.73  | 5.32  | 7.67E-03 | 7.34  | 7.83  |
| <i>PHLDB2</i> | 3.79E-02 | 2.76  | 3.22  | 1.65E-01 | 6.86  | 6.94  |
| <i>NTN1</i>   | 8.47E-03 | 3.10  | 3.53  | 9.91E-01 | 6.47  | 6.47  |
| <i>IREB2</i>  | 2.08E-02 | 3.19  | 3.52  | 7.87E-02 | 7.15  | 7.03  |
| <i>CD14</i>   | 1.26E-02 | 5.79  | 6.10  | 2.82E-04 | 9.60  | 10.23 |
| <i>IFI16</i>  | 1.04E-02 | 6.67  | 6.89  | 3.78E-02 | 7.87  | 8.12  |
| <i>TBXAS1</i> | 3.60E-01 | 4.72  | 4.83  | 1.59E-02 | 7.30  | 7.52  |
| <i>RRP1</i>   | 1.46E-04 | 2.23  | 2.85  | 2.29E-01 | 7.17  | 7.21  |
| <i>AIF1</i>   | 4.92E-01 | 7.31  | 7.37  | 5.35E-01 | 7.58  | 7.64  |
| <i>SNX22</i>  | 3.79E-02 | 1.21  | 1.75  | 2.53E-03 | 7.87  | 8.19  |
| <i>PGM5</i>   | 3.15E-02 | 1.30  | 2.16  | 2.63E-04 | 6.97  | 7.20  |
| <i>SYN1</i>   | 7.60E-01 | 1.80  | 1.89  | 5.25E-05 | 10.77 | 10.29 |
| <i>HPS3</i>   | 2.20E-02 | 4.91  | 5.19  | 8.96E-02 | 6.97  | 7.07  |
| <i>FGFR1</i>  | 1.57E-01 | 0.99  | 1.48  | 5.16E-01 | 6.49  | 6.50  |
| <i>EPS8</i>   | 1.08E-02 | 5.51  | 5.80  | 1.23E-04 | 7.65  | 8.03  |
| <i>PYGL</i>   | 4.00E-02 | 6.66  | 6.81  | 1.72E-03 | 8.11  | 8.44  |
| <i>TXLNA</i>  | 3.19E-02 | 1.17  | 1.97  | 3.91E-05 | 9.71  | 10.15 |
| <i>MEGF11</i> | 1.42E-02 | 2.27  | 2.72  | 1.40E-01 | 6.93  | 7.01  |
| <i>DPP6</i>   | 3.05E-04 | 11.72 | 11.58 | 1.24E-07 | 7.86  | 7.43  |
| <i>TRIM14</i> | 1.50E-02 | 2.42  | 2.83  | 3.05E-01 | 6.57  | 6.55  |
| <i>IL1RAP</i> | 2.69E-03 | 4.37  | 4.07  | 3.52E-01 | 6.66  | 6.68  |
| <i>TFEC</i>   | 3.32E-02 | 1.92  | 2.38  | 6.96E-01 | 6.56  | 6.57  |
| <i>MAML3</i>  | 1.06E-02 | 2.05  | 2.61  | 1.05E-04 | 6.52  | 6.58  |
| <i>CD69</i>   | 4.28E-02 | 1.52  | 2.01  | 9.62E-02 | 6.61  | 6.66  |
| <i>CHST15</i> | 8.89E-05 | 8.31  | 8.04  | 2.13E-01 | 9.73  | 9.63  |
| <i>SKIL</i>   | 1.90E-02 | 2.13  | 2.53  | 8.60E-03 | 6.59  | 6.62  |
| <i>SYNE2</i>  | 1.97E-01 | 2.52  | 2.87  | 5.81E-01 | 6.51  | 6.52  |
| <i>LIMD2</i>  | 2.29E-02 | 2.76  | 3.04  | 4.57E-02 | 6.59  | 6.54  |

|                 |          |      |      |          |       |       |
|-----------------|----------|------|------|----------|-------|-------|
| <i>MCF2L</i>    | 4.31E-04 | 1.75 | 2.40 | 1.59E-03 | 8.58  | 8.79  |
| <i>TMEM156</i>  | 2.43E-04 | 6.99 | 7.47 | 2.22E-04 | 8.48  | 9.03  |
| <i>KCNJ3</i>    | 4.41E-03 | 1.40 | 2.09 | 3.47E-02 | 6.57  | 6.53  |
| <i>A2M</i>      | 4.23E-01 | 8.54 | 8.66 | 2.57E-03 | 10.30 | 10.67 |
| <i>ADAP2</i>    | 5.13E-01 | 7.00 | 7.04 | 9.48E-04 | 7.73  | 8.05  |
| <i>ADCY7</i>    | 3.02E-01 | 4.75 | 4.83 | 2.83E-04 | 7.22  | 7.41  |
| <i>ADPGK</i>    | 2.24E-01 | 6.14 | 6.07 | 2.04E-03 | 7.87  | 7.96  |
| <i>ALPK1</i>    | 9.64E-02 | 4.68 | 4.84 | 2.20E-05 | 6.88  | 7.08  |
| <i>AOAH</i>     | 1.43E-01 | 2.65 | 2.91 | 3.36E-06 | 6.72  | 6.88  |
| <i>APBB1IP</i>  | 6.76E-02 | 5.32 | 5.52 | 4.14E-02 | 8.30  | 8.54  |
| <i>ARHGAP10</i> | 5.35E-02 | 5.54 | 5.70 | 4.04E-04 | 7.24  | 7.43  |
| <i>ARHGAP15</i> | 2.65E-01 | 3.50 | 3.65 | 1.99E-04 | 7.00  | 7.19  |
| <i>B3GNT5</i>   | 1.62E-01 | 2.40 | 2.64 | 2.85E-02 | 6.52  | 6.57  |
| <i>BAIAP2L1</i> | 8.46E-02 | 1.93 | 2.25 | 3.88E-03 | 6.56  | 6.63  |
| <i>BLM</i>      | 3.29E-01 | 3.29 | 3.42 | 1.57E-03 | 6.91  | 7.06  |
| <i>BNC2</i>     | NA       | NA   | NA   | 3.32E-05 | 6.63  | 6.76  |
| <i>C10orf11</i> | 5.05E-02 | 3.29 | 3.57 | 2.52E-05 | 6.80  | 6.93  |
| <i>CCDC50</i>   | 3.61E-01 | 3.45 | 3.33 | 9.83E-03 | 7.46  | 7.66  |
| <i>CD53</i>     | 4.09E-01 | 6.56 | 6.48 | 4.96E-02 | 7.21  | 7.35  |
| <i>COBLL1</i>   | 8.58E-01 | 7.28 | 7.27 | 2.05E-03 | 9.35  | 9.66  |
| <i>COL11A1</i>  | 1.40E-01 | 1.45 | 2.05 | 6.12E-05 | 7.09  | 7.28  |
| <i>COL20A1</i>  | 2.67E-01 | 6.83 | 6.93 | 3.27E-02 | 7.56  | 7.79  |
| <i>CREB3L2</i>  | 1.26E-01 | 1.22 | 1.75 | 7.25E-03 | 8.38  | 8.60  |
| <i>CRTAP</i>    | 4.32E-01 | 4.57 | 4.49 | 1.32E-04 | 7.20  | 7.35  |
| <i>CSF3R</i>    | 1.22E-01 | 6.30 | 6.45 | 5.35E-05 | 7.24  | 7.63  |
| <i>CSPG4</i>    | 1.60E-01 | 5.75 | 5.91 | 6.72E-04 | 7.68  | 8.16  |
| <i>CTSB</i>     | 1.77E-03 | 9.17 | 9.01 | 1.13E-04 | 10.81 | 11.11 |
| <i>DIAPH2</i>   | 4.59E-10 | 7.36 | 6.77 | 4.22E-02 | 7.33  | 7.46  |
| <i>DISC1</i>    | 6.16E-02 | 6.02 | 6.15 | 6.35E-05 | 6.56  | 6.64  |
| <i>DOCK8</i>    | 9.14E-01 | 3.56 | 3.58 | 8.96E-03 | 7.37  | 7.68  |
| <i>EDA</i>      | 7.60E-01 | 2.46 | 2.53 | 4.92E-04 | 6.48  | 6.51  |
| <i>EIF2B5</i>   | 8.49E-02 | 7.06 | 7.14 | 3.56E-03 | 8.54  | 8.77  |
| <i>EPAS1</i>    | 1.11E-01 | 1.46 | 1.90 | 7.25E-03 | 10.04 | 10.34 |
| <i>FAM105A</i>  | 2.85E-01 | 4.45 | 4.55 | 4.56E-03 | 6.91  | 7.00  |
| <i>FAM160A1</i> | NA       | NA   | NA   | 1.30E-03 | 6.56  | 6.63  |
| <i>FCGR2A</i>   | 1.20E-01 | 4.86 | 5.06 | 5.26E-03 | 6.95  | 7.19  |
| <i>FGD2</i>     | 5.18E-01 | 1.72 | 1.93 | 1.59E-04 | 7.26  | 7.62  |
| <i>FLI1</i>     | 1.12E-01 | 5.43 | 5.61 | 4.50E-05 | 7.31  | 7.64  |
| <i>FMNL3</i>    | 2.57E-01 | 2.13 | 1.91 | 2.35E-02 | 6.81  | 6.88  |
| <i>FOS</i>      | 1.10E-01 | 7.32 | 7.53 | 7.28E-03 | 8.64  | 9.21  |
| <i>GMFG</i>     | 3.23E-01 | 6.17 | 6.08 | 2.93E-05 | 7.75  | 8.06  |
| <i>GNS</i>      | 8.42E-01 | 1.32 | 1.19 | 8.91E-03 | 10.74 | 10.89 |
| <i>GPNMB</i>    | 7.06E-01 | 6.75 | 6.71 | 4.55E-02 | 8.11  | 8.42  |
| <i>HLA-DRA</i>  | 1.31E-01 | 6.41 | 6.59 | 1.81E-02 | 9.34  | 9.83  |
| <i>ICA1</i>     | 2.75E-16 | 7.78 | 7.13 | 3.22E-04 | 8.77  | 9.12  |
| <i>INTS8</i>    | 5.04E-02 | 5.79 | 5.90 | 4.71E-02 | 8.26  | 8.37  |

|                |          |      |      |          |       |       |
|----------------|----------|------|------|----------|-------|-------|
| <i>IPO8</i>    | 3.79E-01 | 3.67 | 3.76 | 4.57E-02 | 7.90  | 8.09  |
| <i>IRAK2</i>   | 7.50E-01 | 1.37 | 1.19 | 2.28E-05 | 7.49  | 7.79  |
| <i>ITGAX</i>   | 5.06E-02 | 5.84 | 6.00 | 8.24E-04 | 6.65  | 6.75  |
| <i>KAT2A</i>   | 3.98E-01 | 7.86 | 7.82 | 1.14E-05 | 10.24 | 10.60 |
| <i>KDELRL1</i> | 2.01E-01 | 6.49 | 6.44 | 4.83E-02 | 8.80  | 8.91  |
| <i>LY86</i>    | 9.34E-01 | 6.72 | 6.73 | 1.45E-03 | 7.40  | 7.68  |
| <i>LYPD1</i>   | 4.47E-01 | 3.91 | 3.82 | 4.94E-02 | 8.49  | 8.73  |
| <i>MGAT5</i>   | 8.48E-01 | 2.13 | 2.20 | 2.13E-02 | 6.42  | 6.45  |
| <i>MLST8</i>   | 2.19E-01 | 5.84 | 5.91 | 1.92E-02 | 7.93  | 8.07  |
| <i>MLXIPL</i>  | NA       | NA   | NA   | 3.25E-04 | 7.59  | 7.91  |
| <i>MPZL1</i>   | 7.63E-01 | 4.17 | 4.19 | 4.49E-02 | 7.13  | 7.21  |
| <i>NCK2</i>    | 2.58E-01 | 1.38 | 1.71 | 2.77E-02 | 9.17  | 9.35  |
| <i>OLIG2</i>   | 6.85E-01 | 9.25 | 9.28 | 1.42E-02 | 9.59  | 9.89  |
| <i>PDGFRA</i>  | 1.98E-04 | 5.98 | 5.62 | 1.38E-02 | 8.67  | 8.99  |
| <i>PIK3AP1</i> | 1.49E-01 | 2.16 | 2.43 | 6.06E-05 | 6.79  | 7.01  |
| <i>PIK3CA</i>  | 8.57E-01 | 4.45 | 4.47 | 2.75E-02 | 7.69  | 7.81  |
| <i>PLCE1</i>   | 9.56E-02 | 5.73 | 5.92 | 9.76E-09 | 7.54  | 7.98  |
| <i>PLCG2</i>   | 2.18E-01 | 3.30 | 3.49 | 1.31E-05 | 7.36  | 7.71  |
| <i>PRRX1</i>   | 6.66E-01 | 2.99 | 3.06 | 1.51E-05 | 7.24  | 7.55  |
| <i>PXDN</i>    | 2.06E-04 | 6.91 | 6.72 | 9.49E-03 | 7.26  | 7.38  |
| <i>RCSD1</i>   | 8.89E-01 | 5.40 | 5.41 | 1.50E-02 | 6.88  | 7.01  |
| <i>RGS1</i>    | 1.08E-01 | 5.76 | 6.07 | 9.09E-03 | 7.50  | 8.13  |
| <i>RGS10</i>   | 8.32E-01 | 5.63 | 5.64 | 8.73E-03 | 7.38  | 7.56  |
| <i>ROCK1</i>   | 7.93E-02 | 2.45 | 2.82 | 4.76E-03 | 6.83  | 7.00  |
| <i>RPS6KA3</i> | 1.27E-04 | 4.02 | 3.58 | 1.09E-02 | 6.88  | 6.94  |
| <i>S100Z</i>   | 5.66E-01 | 2.47 | 2.57 | 4.45E-02 | 6.49  | 6.53  |
| <i>SH3RF3</i>  | 2.38E-01 | 1.54 | 1.83 | 3.65E-03 | 7.29  | 7.44  |
| <i>SLC2A5</i>  | 4.43E-01 | 7.04 | 7.11 | 1.78E-02 | 8.36  | 8.73  |
| <i>SLC9A9</i>  | 4.22E-01 | 4.30 | 4.38 | 7.20E-04 | 7.83  | 8.09  |
| <i>SNAP23</i>  | 1.16E-01 | 5.93 | 6.16 | 2.32E-05 | 7.19  | 7.41  |
| <i>SSTR2</i>   | 1.05E-01 | 3.84 | 4.14 | 5.87E-04 | 9.60  | 9.94  |
| <i>STK32B</i>  | 5.24E-01 | 5.09 | 5.04 | 1.59E-04 | 7.28  | 7.55  |
| <i>TGFBR1</i>  | 8.71E-01 | 1.57 | 1.66 | 6.29E-04 | 6.59  | 6.67  |
| <i>TGFBR2</i>  | NA       | 0.82 | 1.14 | 1.57E-03 | 8.17  | 8.60  |
| <i>TRPM2</i>   | 5.75E-01 | 3.12 | 3.03 | 9.18E-03 | 7.39  | 7.59  |
| <i>TSEN34</i>  | 2.34E-01 | 6.07 | 6.00 | 1.21E-02 | 9.20  | 9.32  |
| <i>USP24</i>   | NA       | NA   | NA   | 7.34E-03 | 8.92  | 9.06  |
| <i>WDFY4</i>   | NA       | NA   | NA   | 8.41E-03 | 6.57  | 6.61  |
| <i>WIPF1</i>   | 8.36E-01 | 7.65 | 7.68 | 4.26E-02 | 6.78  | 6.86  |
| <i>ZC3HAV1</i> | 4.65E-01 | 6.46 | 6.50 | 3.01E-04 | 7.32  | 7.53  |
| <i>ZNF493</i>  | 7.87E-01 | 1.57 | 1.47 | 1.14E-02 | 7.88  | 8.03  |
| <i>ZYX</i>     | 7.04E-02 | 8.16 | 8.24 | 2.03E-02 | 8.41  | 8.53  |

83 Note: We chose top-ranked 1,000 risk genes for AD from the genetic co-expression  
84 analysis to perform differential gene expression analyses based on two bulk-based  
85 transcriptomic profiles (GSE109887, n = 78; GSE15222, n = 363). We found that 421  
86 genes showed significantly positive associations with AD (42.1%) among two independent

87 bulk-based transcriptomic datasets. We used two-sided Student's T test to assess the  
88 significance for each gene. NA: Not applicable.  
89  
90
